# Supplementary material
Source: MDPI journal article supplement (https://www.mdpi.com/1996-1073/16/20/7217)

Sample: BR-CO2  
Operator:  
Submitter:  
File Name: C:\D\ASAP2010\DATA\001-554.SMP

Started: 2021-02-19 9:57:03 Analysis Adsorptive: CO2  
Completed: 2021-02-23 6:23:01 Analysis Bath: 298.15 K  
Report Time: 2020-07-27 14:23:21 Thermal Correction: No  
Sample Weight: 1.7396 g Smoothed Pressures: No  
Warm Freespace: 25.3789 cm<sup>3</sup> Cold Freespace: 25.3497 cm<sup>3</sup>  
MEASURED  
Equil. Interval: 10 secs Low Pressure Dose: 1.00 cm<sup>3</sup>/g STP

## Analysis Log

| Relative Pressure | Pressure (mmHg) | Vol Adsorbed (cm <sup>3</sup> /g STP) | Elapsed Time (HR:MN) | Saturation Press. (mmHg) |
|-------------------|-----------------|---------------------------------------|----------------------|--------------------------|
|                   |                 |                                       |                      | 48252.09009              |
| 0.000513951       | 24.75922        | 0.8169                                | 11:12                |                          |
| 0.001029468       | 49.67399        | 1.6757                                | 12:49                |                          |
| 0.001549201       | 74.75218        | 2.5432                                | 14:25                |                          |
| 0.002077359       | 100.25692       | 3.4102                                | 16:02                |                          |
| 0.002613418       | 126.10290       | 4.2675                                | 17:39                |                          |
| 0.003167431       | 152.83519       | 5.0946                                | 19:13                |                          |
| 0.003773871       | 182.09715       | 5.8123                                | 20:25                |                          |
| 0.004421024       | 213.32364       | 6.4449                                | 21:21                |                          |
| 0.005105949       | 246.37271       | 7.0244                                | 22:06                |                          |
| 0.005814426       | 280.55820       | 7.5558                                | 22:43                |                          |
| 0.006532221       | 315.19330       | 8.0674                                | 23:20                |                          |
| 0.007284691       | 351.50156       | 8.5096                                | 23:47                |                          |
| 0.008049212       | 388.39130       | 8.9329                                | 24:12                |                          |
| 0.008810640       | 425.13181       | 9.3624                                | 24:37                |                          |
| 0.009586124       | 462.55051       | 9.7703                                | 25:02                |                          |
| 0.010354236       | 499.61353       | 10.1978                               | 25:27                |                          |
| 0.011108483       | 536.00751       | 10.6524                               | 25:52                |                          |
| 0.011874739       | 572.93096       | 11.0826                               | 26:17                |                          |
| 0.012648651       | 610.32385       | 11.5062                               | 26:43                |                          |
| 0.013412666       | 647.13915       | 11.9436                               | 27:08                |                          |
| 0.014170975       | 683.77917       | 12.3886                               | 27:33                |                          |
| 0.014930568       | 720.43109       | 12.8330                               | 27:58                |                          |
| 0.015693638       | 757.25085       | 13.2636                               | 28:23                |                          |
| 0.016423510       | 792.46869       | 13.7454                               | 28:48                |                          |
| 0.017160900       | 828.04932       | 14.2155                               | 29:14                |                          |

Sample: BR-CO2

Operator:

Submitter:

File Name: C:\D\ASAP2010\DATA\001-554.SMP

Started: 2021-02-19 9:57:03

Analysis Adsorptive: CO2

Completed: 2021-02-23 6:23:01

Analysis Bath: 298.15 K

Report Time: 2020-07-27 14:23:21

Thermal Correction: No

Sample Weight: 1.7396 g

Smoothed Pressures: No

Warm Freespace: 25.3789 cm<sup>3</sup>Cold Freespace: 25.3497 cm<sup>3</sup>

MEASURED

Equil. Interval: 10 secs

Low Pressure Dose: 1.00 cm<sup>3</sup>/g STP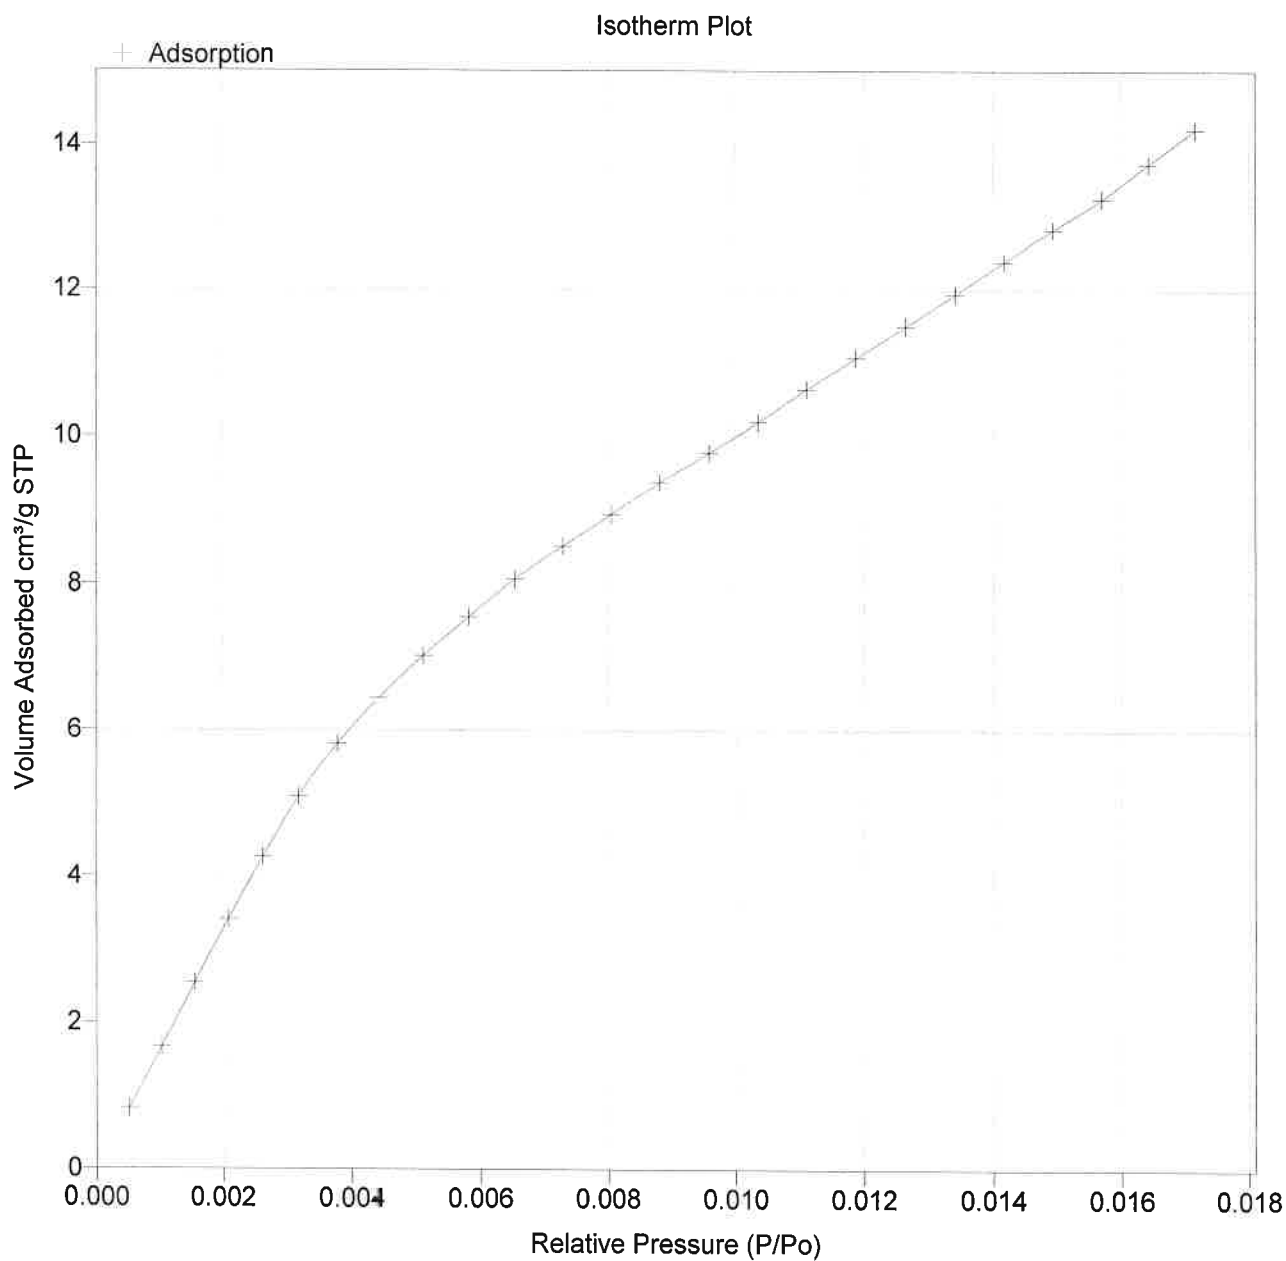

Sample: BR-CO2

Operator:

Submitter:

File Name: C:\C\ASAP2010\DATA\001-554.SMP

Started: 2021-02-19 9:57:03

Analysis Adsorptive: CO2

Completed: 2021-02-23 6:23:01

Analysis Bath: 298.15 K

Report Time: 2020-07-27 14:23:21

Thermal Correction: No

Sample Weight: 1.7396 g

Smoothed Pressures: No

Warm Freespace: 25.3789 cm<sup>3</sup>Cold Freespace: 25.3497 cm<sup>3</sup>

MEASURED

Equil. Interval: 10 secs

Low Pressure Dose: 1.00 cm<sup>3</sup>/g STP

## Dubinin-Astakhov Report

Slope:

-0.067362 ± 0.000581

Y-Intercept:

1.430081 ± 0.005625

Correlation Coefficient:

9.99145e-01

Relative Pressure Range:

0.000100000 to 0.050000000

Characteristic Energy:

25.213092 kJ/mole

Limiting Micropore Capacity:

26.920354 cm<sup>3</sup>/g STP

Limiting Micropore Volume:

0.049280 ± 0.000642 cm<sup>3</sup>/g

Equivalent Surface Area:

130.887486 m<sup>2</sup>/g

Affinity Coefficient (beta):

0.461

Optimize Exponent:

Yes

Exponent:

2.6210

Density Conversion Factor:

0.001831

Molecular Cross-Section:

0.170 nm<sup>2</sup>

Medek Quantities:

Mean Equivalent Pore Diameter:

1.506039 nm

Maximum Differential Pore Volume:

0.101378 cm<sup>3</sup>/g-nm

Modal Equivalent Pore Diameter:

1.395695 nm

| Absolute Pressure<br>(mmHg) | Relative Pressure | Volume Adsorbed<br>(cm <sup>3</sup> /g STP) | Log Volume Adsorbed<br>(cm <sup>3</sup> /g STP) | Log (Po/P) <sup>2.6210</sup> | Differential Pore Volume<br>(cm <sup>3</sup> /g-nm) |
|-----------------------------|-------------------|---------------------------------------------|-------------------------------------------------|------------------------------|-----------------------------------------------------|
| 24.79922                    | 0.000513951       | 0.8169                                      | -0.0878                                         | 22.6608519                   | 0.034005                                            |
| 49.67399                    | 0.001029463       | 1.6757                                      | 0.2242                                          | 17.6101002                   | 0.053815                                            |
| 74.75218                    | 0.001549201       | 2.5432                                      | 0.4054                                          | 14.9981310                   | 0.067981                                            |
| 100.23692                   | 0.002077359       | 3.4102                                      | 0.5328                                          | 13.2806180                   | 0.078487                                            |
| 126.10290                   | 0.002613413       | 4.2675                                      | 0.6302                                          | 12.0255725                   | 0.086288                                            |
| 152.83519                   | 0.003167431       | 5.0946                                      | 0.7071                                          | 11.0331060                   | 0.091914                                            |
| 182.09715                   | 0.003773871       | 5.8123                                      | 0.7643                                          | 10.1743995                   | 0.095553                                            |
| 213.32364                   | 0.004421024       | 6.4449                                      | 0.8092                                          | 9.4352470                    | 0.097939                                            |
| 246.37271                   | 0.005105949       | 7.0244                                      | 0.8466                                          | 8.7922859                    | 0.099527                                            |
| 280.55820                   | 0.005814425       | 7.5558                                      | 0.8783                                          | 8.2361511                    | 0.100529                                            |
| 315.19330                   | 0.006532221       | 8.0674                                      | 0.9067                                          | 7.7568754                    | 0.101118                                            |
| 351.50156                   | 0.007284691       | 8.5096                                      | 0.9299                                          | 7.3239793                    | 0.101352                                            |
| 388.39130                   | 0.008049212       | 8.9329                                      | 0.9510                                          | 6.9411166                    | 0.101352                                            |
| 425.13181                   | 0.008810640       | 9.3624                                      | 0.9714                                          | 6.6052714                    | 0.101142                                            |
| 462.55051                   | 0.009586124       | 9.7703                                      | 0.9899                                          | 6.3010704                    | 0.100757                                            |
| 499.61353                   | 0.010354235       | 10.1978                                     | 1.0085                                          | 6.0308272                    | 0.100171                                            |
| 536.00751                   | 0.011108483       | 10.6524                                     | 1.0274                                          | 5.7906636                    | 0.099353                                            |
| 572.98096                   | 0.011874739       | 11.0826                                     | 1.0446                                          | 5.5683802                    | 0.098403                                            |

Sample: BR-CO2

Operator:

Submitter:

File Name: C:\D\ASAP2010\DATA\001-554.SMP

Started: 2021-02-19 9:57:03

Analysis Adsorptive: CO2

Completed: 2021-02-23 6:23:01

Analysis Bath: 298.15 K

Report Time: 2020-07-27 14:23:21

Thermal Correction: No

Sample Weight: 1.7396 g

Smoothed Pressures: No

Warm Freespace: 25.3789 cm<sup>3</sup>Cold Freespace: 25.3497 cm<sup>3</sup>

MEASURED

Equil. Interval: 10 secs

Low Pressure Dose: 1.00 cm<sup>3</sup>/g STP

## Dubinin-Astakhov Report

| Absolute Pressure<br>(mmHg) | Relative Pressure | Volume Adsorbed<br>(cm <sup>3</sup> /g STP) | Log Volume Adsorbed<br>(cm <sup>3</sup> /g STP) | Log<br>(Po/P)^2.6210 | Differential Pore Volume<br>(cm <sup>3</sup> /g-nm) |
|-----------------------------|-------------------|---------------------------------------------|-------------------------------------------------|----------------------|-----------------------------------------------------|
| 610.32385                   | 0.012648651       | 11.5062                                     | 1.0609                                          | 5.3629185            | 0.097311                                            |
| 647.18915                   | 0.013412666       | 11.9436                                     | 1.0771                                          | 5.1763246            | 0.096026                                            |
| 683.77917                   | 0.014170975       | 12.3886                                     | 1.0930                                          | 5.0050490            | 0.094565                                            |
| 720.43109                   | 0.014930568       | 12.8330                                     | 1.1083                                          | 4.8457220            | 0.092958                                            |
| 757.25085                   | 0.015693638       | 13.2636                                     | 1.1227                                          | 4.6965896            | 0.091267                                            |
| 792.46869                   | 0.016423510       | 13.7454                                     | 1.1382                                          | 4.5630859            | 0.089225                                            |
| 828.04932                   | 0.017160900       | 14.2155                                     | 1.1528                                          | 4.4363551            | 0.087090                                            |

Sample: BR-CO2

Operator:

Submitter:

File Name: C:\D\ASAP2010\DATA\001-554.SMP

Started: 2021-02-19 9:57:03

Analysis Adsorptive: CO2

Completed: 2021-02-23 6:23:01

Analysis Bath: 298.15 K

Report Time: 2020-07-27 14:23:21

Thermal Correction: No

Sample Weight: 1.7396 g

Smoothed Pressures: No

Warm Freespace: 25.3789 cm<sup>3</sup>Cold Freespace: 25.3497 cm<sup>3</sup>

MEASURED

Equil. Interval: 10 secs

Low Pressure Dose: 1.00 cm<sup>3</sup>/g STP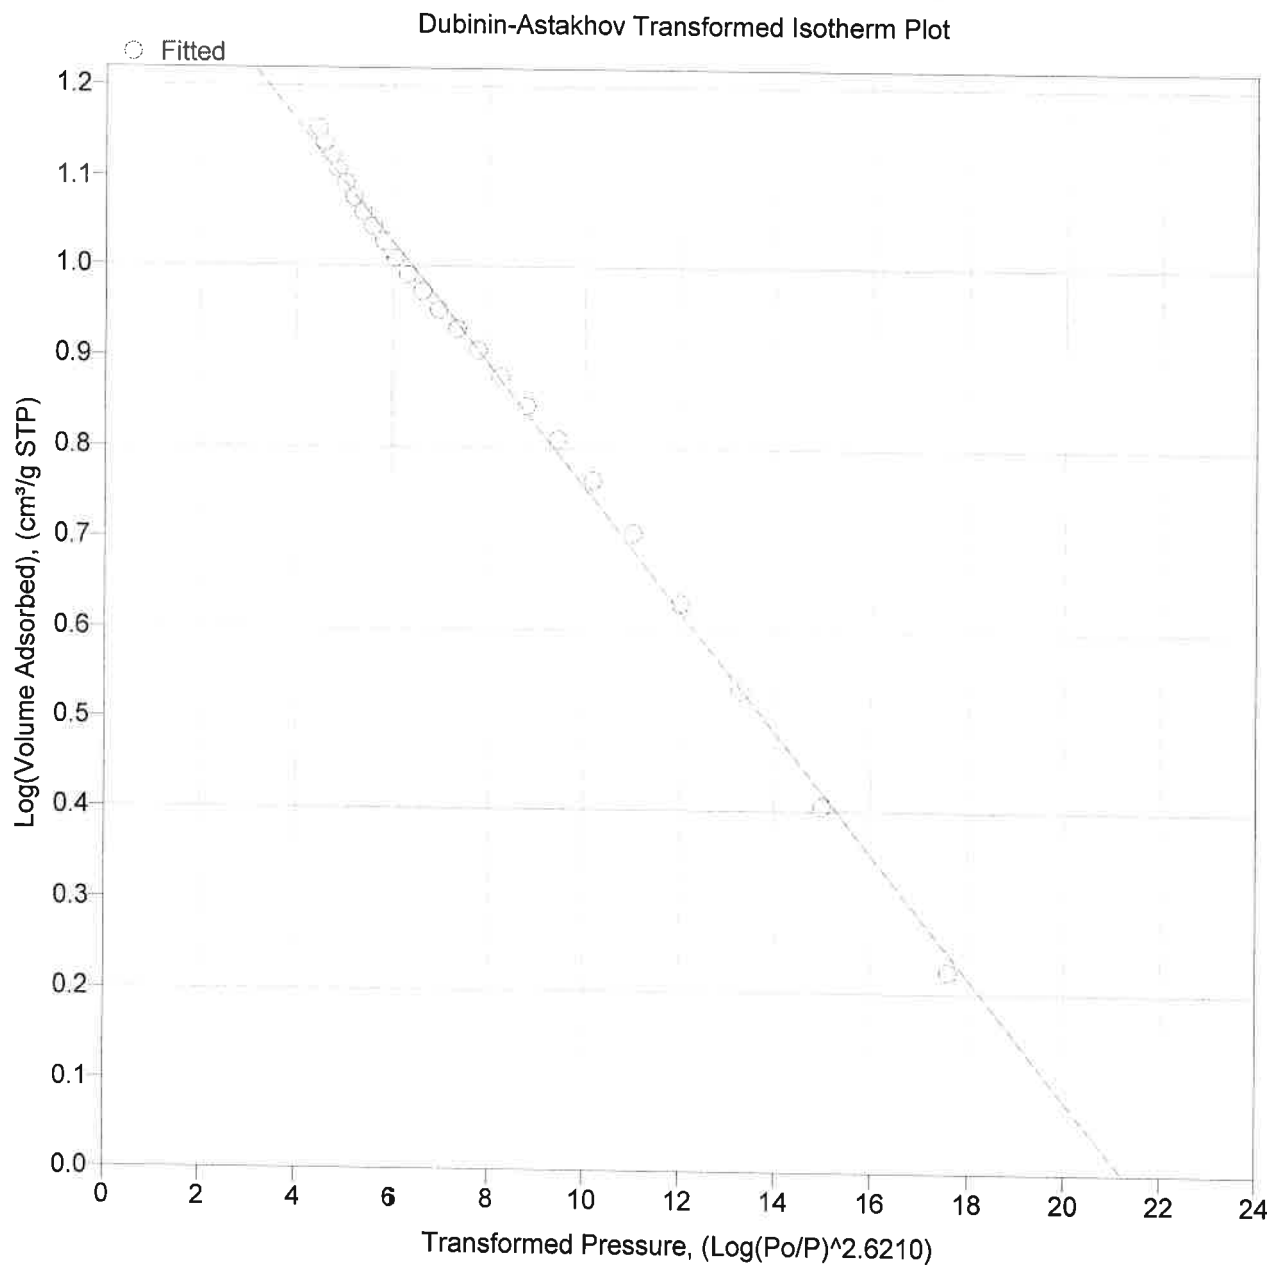

Sample: BR-CO2

Operator:

Submitter:

File Name: C:\D\ASAP2010\DATA\001-554.SMP

Started: 2021-02-19 9:57:03

Analysis Adsorptive: CO2

Completed: 2021-02-23 6:23:01

Analysis Bath: 298.15 K

Report Time: 2020-07-27 14:23:21

Thermal Correction: No

Sample Weight: 1.7396 g

Smoothed Pressures: No

Warm Freespace: 25.3789 cm<sup>3</sup>Cold Freespace: 25.3497 cm<sup>3</sup>

MEASURED

Equil. Interval: 10 secs

Low Pressure Dose: 1.00 cm<sup>3</sup>/g STP

Dubinin-Astakhov Differential Pore Volume Plot (Exponent = 2.6210)  
+ C:\D\ASAP2010\DATA\001-554.SMP

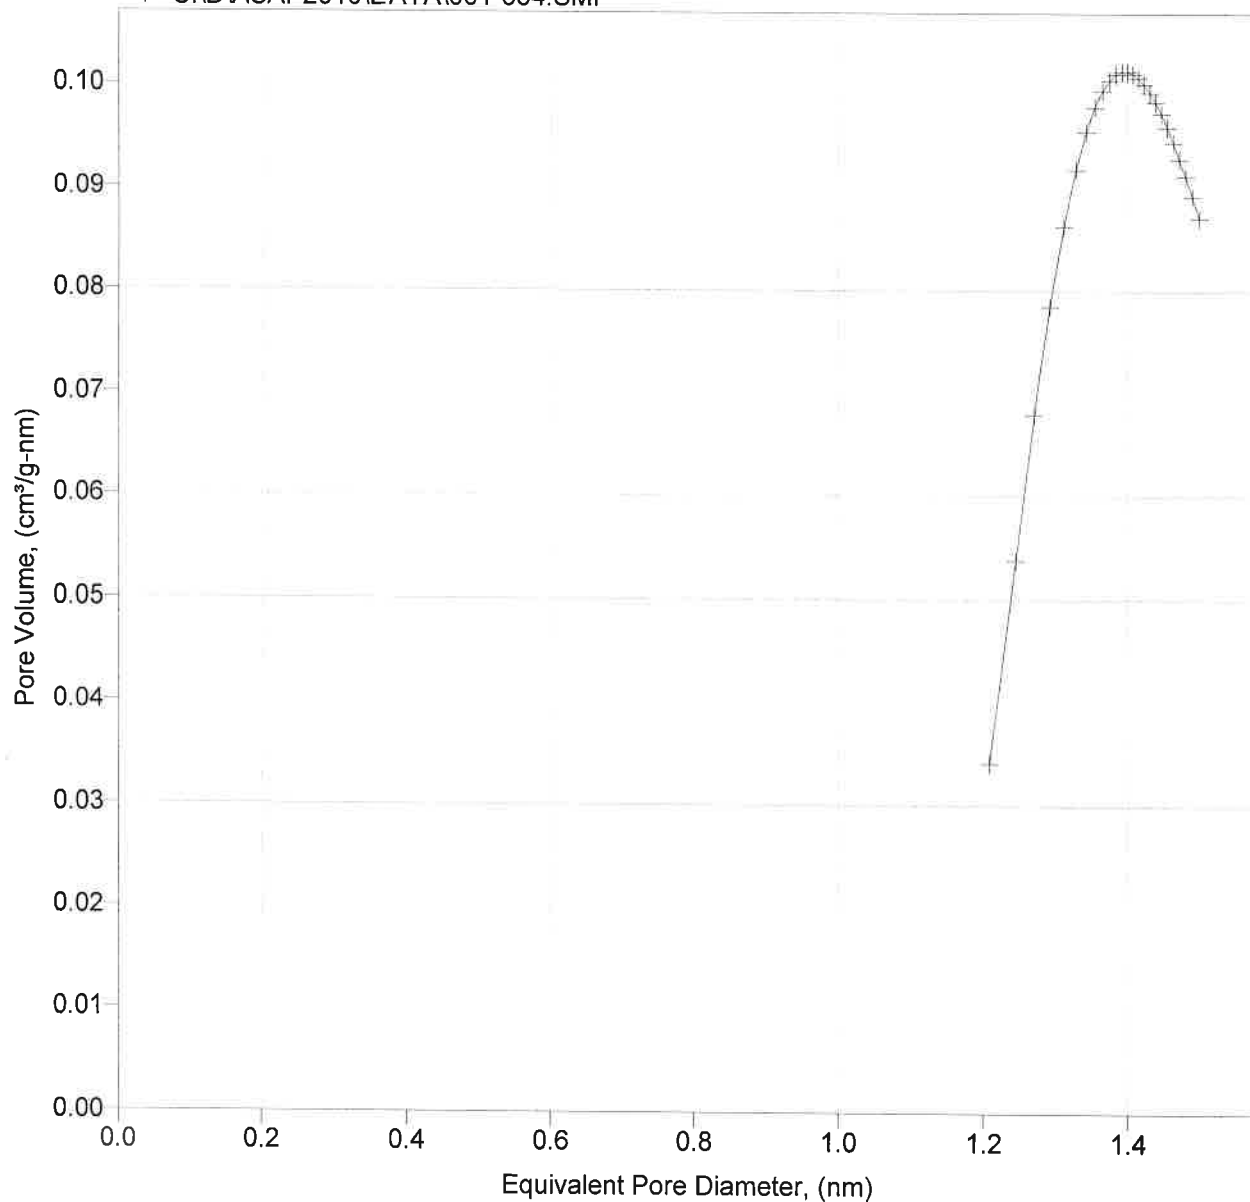

Supplement: s1 [file s1]
