# Supplementary material
Source: MDPI journal article supplement (https://www.mdpi.com/1996-1073/16/20/7217)
Supplement: s1 [file s1]

**Table S13.** The results of CO<sub>2</sub> concentration in soil gas based on measurements series from 21.11. to 26.11.2022

| <b>21.11.2022</b> |           | <b>CO<sub>2</sub> concentration in the accumulation chamber [ppm]</b> |           |        |           |        |           |        |
|-------------------|-----------|-----------------------------------------------------------------------|-----------|--------|-----------|--------|-----------|--------|
| point             | test/time | 0 min                                                                 | 1 min     | 2 min  | 3 min     | 4 min  | 5 min     | 6 min  |
| 2202              | probe 1   | 350.0                                                                 | 408.2     | 443.6  | 484.3     | 523.9  | 548.5     | 558.1  |
| 2217              | probe 2   | 338.2                                                                 | 395.0     | 436.6  | 481.3     | 502.3  | 520.3     | 571.6  |
| 2219              | probe 3   | 354.4                                                                 | 422.3     | 482.6  | 528.9     | 567.2  | 604.0     | 628.5  |
| 2226              | probe 4   | 329.9                                                                 | 356.6     | 382.0  | 408.2     | 423.7  | 439.3     | 454.9  |
| 2229              | probe 5   | 358.5                                                                 | 484.9     | 605.5  | 716.3     | 807.5  | 896.5     | 968.8  |
| <b>22.11.2022</b> |           | <b>CO<sub>2</sub> concentration in the accumulation chamber [ppm]</b> |           |        |           |        |           |        |
| point             | test/time | 0 min                                                                 | 1 min     | 2 min  | 3 min     | 4 min  | 5 min     | 6 min  |
| 2202              | probe 1   | 311.7                                                                 | 362.3     | 398.4  | 445.5     | 480.0  | 510.9     | 546.1  |
| 2217              | probe 2   | 323.0                                                                 | 348.1     | 370.9  | 398.1     | 417.9  | 435.2     | 452.8  |
| 2219              | probe 3   | 306.8                                                                 | 327       | 349.6  | 370.9     | 386.5  | 401.5     | 414.1  |
| 2226              | probe 4   | 320.4                                                                 | 334.5     | 348.4  | 360.4     | 372.1  | 380.1     | 389.9  |
| 2229              | probe 5   | 328.2                                                                 | 439.5     | 537.8  | 624.0     | 709.7  | 788.3     | 864.8  |
| <b>23.11.2022</b> |           | <b>CO<sub>2</sub> concentration in the accumulation chamber [ppm]</b> |           |        |           |        |           |        |
| point             | test/time | 0 min                                                                 | 1 min     | 2 min  | 3 min     | 4 min  | 5 min     | 6 min  |
| 2202              | probe 1   | 345.1                                                                 | 381.7     | 400.3  | 420.8     | 439.2  | 451.8     | 466.9  |
| 2217              | probe 2   | 317.2                                                                 | 357.6     | 395.6  | 418.8     | 442.5  | 460.1     | 479.9  |
| 2219              | probe 3   | 326.0                                                                 | 343.1     | 363.2  | 377.9     | 393.9  | 409.7     | 419.4  |
| 2226              | probe 4   | 297.7                                                                 | 315.4     | 333.4  | 345.3     | 363.7  | 378.0     | 390.4  |
| 2229              | probe 5   | 385.8                                                                 | 408.0     | 444.2  | 478.0     | 497.0  | 524.8     | 541.0  |
| <b>24.11.2022</b> |           | <b>CO<sub>2</sub> concentration in the accumulation chamber [ppm]</b> |           |        |           |        |           |        |
| point             | test/time | 0 min                                                                 | 1 min     | 2 min  | 3 min     | 4 min  | 5 min     | 6 min  |
| 6                 | probe 1   | 345.6                                                                 | 460.1     | 557.2  | 626       | 690.6  | 739.8     | 783.1  |
| 2208              | probe 2   | 487.5                                                                 | 682.1     | 844.9  | 976.9     | 1126.4 | 1254.5    | 1386.6 |
| 2219              | probe 3   | 344.6                                                                 | 367.4     | 389.4  | 412.4     | 434.1  | 452.8     | 474.8  |
| ST1/P2P           | probe 4   | 323.1                                                                 | 343.1     | 364.2  | 365.8     | 373.4  | 377.6     | 385.5  |
| ST2/P4P           | probe 5   | 426.7                                                                 | 428.4     | 446.5  | 482.0     | 491.6  | 495.4     | 535.2  |
| <b>25.11.2022</b> |           | <b>CO<sub>2</sub> concentration in the accumulation chamber [ppm]</b> |           |        |           |        |           |        |
| point             | test/time | 0 min                                                                 | 1 min     | 2 min  | 3 min     | 4 min  | 5 min     | 6 min  |
| 2202              | probe 1   | 398.0                                                                 | 550.4     | 842.6  | 959.8     | 1149.5 | 1244.6    | 1325.8 |
| 2217              | probe 2   | 369.1                                                                 | 556.3     | 739.7  | 893.8     | 1027.5 | 1147.3    | 1252.6 |
| 2219              | probe 3   | 392.4                                                                 | 478.1     | 558.0  | 642.0     | 720.5  | 790.3     | 853.8  |
| 2226              | probe 4   | 327.8                                                                 | 345.1     | 361.2  | 379.0     | 390.6  | 404.9     | 421.2  |
| 2229              | probe 5   | 338.1                                                                 | 362.8     | 401.3  | 435.1     | 478.2  | 515.4     | 539.8  |
| <b>26.11.2022</b> |           | <b>CO<sub>2</sub> concentration in the accumulation chamber [ppm]</b> |           |        |           |        |           |        |
| point             | test/time | point                                                                 | test/time | point  | test/time | point  | test/time | point  |
| 2202              | probe 1   | 394.1                                                                 | 417.9     | 449.6  | 470.8     | 483.8  | 492.5     | 516.8  |
| 2217              | probe 2   | 448.9                                                                 | 480.0     | 505.3  | 542.6     | 556.5  | 559.5     | 574.4  |
| 2219              | probe 3   | 410.9                                                                 | 462.2     | 510.4  | 555.4     | 595.3  | 630.3     | 655.9  |
| 2226              | probe 4   | 326.0                                                                 | 345.0     | 354.2  | 365.8     | 376.3  | 383.6     | 394.9  |
| 2229              | probe 5   | 782.7                                                                 | 882.0     | 1039.7 | 1219.0    | 1367.5 | 1493.6    | 1602.4 |

**Table S14.** The results of CO<sub>2</sub> concentration in soil gas based on measurements series from 28.11. to 02.12.2022

| <b>28.11.2022</b> |           | <b>CO<sub>2</sub> concentration in the accumulation chamber [ppm]</b> |       |       |       |       |       |        |
|-------------------|-----------|-----------------------------------------------------------------------|-------|-------|-------|-------|-------|--------|
| point             | test/time | 0 min                                                                 | 1 min | 2 min | 3 min | 4 min | 5 min | 6 min  |
| 2202              | probe 1   | 333.5                                                                 | 360.2 | 381.2 | 386.5 | 402.9 | 413.5 | 418.9  |
| 2217              | probe 2   | 354.2                                                                 | 364.9 | 384.4 | 392.8 | 406.0 | 408.0 | 414.2  |
| 2219              | probe 3   | 333.5                                                                 | 345.6 | 360.9 | 372.6 | 379.0 | 384.5 | 389.0  |
| 2226              | probe 4   | 350.4                                                                 | 370.4 | 386.6 | 404.3 | 414.5 | 423.2 | 438.9  |
| 2229              | probe 5   | 425.7                                                                 | 450.9 | 488.1 | 520.7 | 545.3 | 563.9 | 585.7  |
| <b>29.11.2022</b> |           | <b>CO<sub>2</sub> concentration in the accumulation chamber [ppm]</b> |       |       |       |       |       |        |
| point             | test/time | 0 min                                                                 | 1 min | 2 min | 3 min | 4 min | 5 min | 6 min  |
| 2202              | probe 1   | 328.1                                                                 | 334.7 | 345.8 | 353.1 | 363.6 | 374.0 | 384.2  |
| 2217              | probe 2   | 310.5                                                                 | 319.2 | 329.3 | 341.5 | 348.2 | 359.9 | 374.1  |
| 2219              | probe 3   | 329.3                                                                 | 343.1 | 359.5 | 380.1 | 392.5 | 408.7 | 425.0  |
| 2226              | probe 4   | 318.3                                                                 | 327.2 | 335.0 | 341.1 | 345.9 | 353.8 | 361.1  |
| 2229              | probe 5   | 497.4                                                                 | 528.1 | 549.9 | 572.9 | 594.5 | 610.5 | 638.0  |
| <b>30.11.2022</b> |           | <b>CO<sub>2</sub> concentration in the accumulation chamber [ppm]</b> |       |       |       |       |       |        |
| point             | test/time | 0 min                                                                 | 1 min | 2 min | 3 min | 4 min | 5 min | 6 min  |
| 2202              | probe 1   | 300.8                                                                 | 365.6 | 427.6 | 517.5 | 584.1 | 650.7 | 708.2  |
| 2217              | probe 2   | 279.5                                                                 | 307.7 | 359.5 | 402.4 | 435.6 | 470.1 | 495.0  |
| 2219              | probe 3   | 311.0                                                                 | 358.8 | 420.2 | 479.7 | 540.4 | 597.6 | 655.3  |
| 2226              | probe 4   | 279.7                                                                 | 293.0 | 306.6 | 319.2 | 327.2 | 336.3 | 344.7  |
| 2229              | probe 5   | 319.7                                                                 | 433.7 | 559.9 | 693.1 | 816.6 | 928.7 | 1022.8 |
| <b>01.12.2022</b> |           | <b>CO<sub>2</sub> concentration in the accumulation chamber [ppm]</b> |       |       |       |       |       |        |
| point             | test/time | 0 min                                                                 | 1 min | 2 min | 3 min | 4 min | 5 min | 6 min  |
| 2202              | probe 1   | 316.7                                                                 | 384.5 | 449.6 | 498.4 | 546.7 | 595.6 | 650.4  |
| 2217              | probe 2   | 284.3                                                                 | 349.5 | 402.4 | 451.5 | 499.8 | 549.1 | 587.5  |
| 2219              | probe 3   | 270.5                                                                 | 296.4 | 316.5 | 345.3 | 362.1 | 370.7 | 382.5  |
| 2226              | probe 4   | 297.7                                                                 | 305.6 | 319.8 | 324.6 | 344.2 | 354.7 | 367.5  |
| 2229              | probe 5   | 310.2                                                                 | 352.8 | 409.2 | 460.8 | 496.2 | 548.7 | 607.3  |
| <b>02.12.2022</b> |           | <b>CO<sub>2</sub> concentration in the accumulation chamber [ppm]</b> |       |       |       |       |       |        |
| point             | test/time | 0 min                                                                 | 1 min | 2 min | 3 min | 4 min | 5 min | 6 min  |
| 2202              | probe 1   | 290.6                                                                 | 397.1 | 514.2 | 619.7 | 730.4 | 833.6 | 916.5  |
| 2217              | probe 2   | 272.7                                                                 | 297.1 | 323.2 | 354.5 | 375.3 | 377.2 | 401.2  |
| 2219              | probe 3   | 273.4                                                                 | 296.7 | 341.2 | 370.6 | 392.6 | 432.2 | 471.3  |
| 2226              | probe 4   | 265.0                                                                 | 277.5 | 293.1 | 304.4 | 315.7 | 328.7 | 335.6  |
| 2229              | probe 5   | 302.2                                                                 | 320.4 | 352.0 | 391.6 | 431.3 | 470.2 | 509.2  |
