# Supplementary material
Source: MDPI journal article supplement (https://www.mdpi.com/1996-1073/16/20/7217)
Supplement: s1 [file s1]

**Central Mining Institute**  
**Department of Solid Fuels Quality Assessment**

Plac Gwarków 1, 40-166 Katowice  
telephone: 32/ 259-22-78, 259-22-76  
fax.: 32/ 259-22-78  
e-mail: l.rog@gig.eu

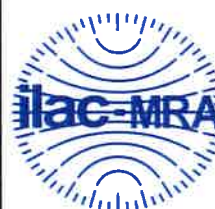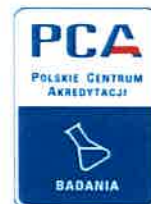

AB 069

**PHYSICOCHEMICAL ANALYSIS**

**TEST REPORT 532/1/2021**

Page number : 1  
Number of pages : 3  
Katowice, date: 05.05.2021

**Customer: Department of Acoustics, Electronics and IT Solutions**  
**Central Mining Institute**

Analyses for particular research methods are made according to the standards and the instructions listed below:

| Determinations                              | Research methods                       | State                        |                |               |                 | Made according to                   |
|---------------------------------------------|----------------------------------------|------------------------------|----------------|---------------|-----------------|-------------------------------------|
|                                             |                                        | As analysed                  | As received    | Dry           | Dry, Ash Free   |                                     |
|                                             |                                        | Symbol                       |                |               |                 |                                     |
| Transient moisture content                  | PN-G-04511:1980 pkt. 2.1*              | -                            | $W_{ex}^r$     | -             | -               | <input checked="" type="checkbox"/> |
| Total moisture content                      | PN-G-04511:1980 pkt. 2.3.4*            | -                            | $W_t^r$        | -             | -               | <input type="checkbox"/>            |
|                                             | IC-29.1, edition 18 from 24.06.2019 r. | -                            | $W_t^r$        | -             | -               | <input checked="" type="checkbox"/> |
| Moisture content in analytical sample       | PN-G-04560:1998                        | $W^a$                        | -              | -             | -               | <input checked="" type="checkbox"/> |
|                                             | PN-G-04511:1980 pkt. 2.4.1*            |                              |                |               |                 | <input type="checkbox"/>            |
|                                             | PN-G-04511:1980 pkt. 2.4.2*            |                              |                |               |                 | <input type="checkbox"/>            |
| Ash content                                 | PN-G-04560:1998                        | $A^a$                        | $A^r$          | $A^d$         | -               | <input checked="" type="checkbox"/> |
|                                             | PN-ISO 1171:2002                       | $A$                          | $A_{ar}$       | $A_d$         | -               | <input type="checkbox"/>            |
| Volatile matter content                     | PN-G-04516:1998                        | $V^a$                        | $V^r$          | $V^d$         | $V^{daf}$       | <input checked="" type="checkbox"/> |
|                                             | PN-ISO 562:2000*                       | $V$                          | $V_{ar}$       | $V_d$         | $V_{daf}$       | <input type="checkbox"/>            |
|                                             | PN-G-04560:1998                        | $V^a$                        | $V^r$          | $V^d$         | $V^{daf}$       | <input type="checkbox"/>            |
| Gross calorific value                       | PN-G-04513:1981*                       | $Q_s^a$                      | $Q_s^r$        | $Q_s^d$       | $Q_s^{daf}$     | <input checked="" type="checkbox"/> |
|                                             | PN-ISO 1928:2002                       | $q_v, gr, ad$                | $q_v, gr, ar$  | $q_v, gr, d$  | $q_v, gr, daf$  | <input type="checkbox"/>            |
| Net calorific value                         | PN-G-04513:1981*                       | $Q_i^a$                      | $Q_i^r$        | $Q_i^d$       | $Q_i^{daf}$     | <input checked="" type="checkbox"/> |
|                                             | PN-ISO 1928:2002                       | $q_v, net, ad$               | $q_v, net, ar$ | $q_v, net, d$ | $q_v, net, daf$ | <input type="checkbox"/>            |
| Caking power of hard coal by the Roga index | PN-G-04518:1981*                       | $RI$                         | -              | -             | -               | <input type="checkbox"/>            |
| The crucible swelling number                | PN-ISO 501:2007                        | $FSI$                        | -              | -             | -               | <input checked="" type="checkbox"/> |
| Audibert - Arnu dilatometer test            | PN-G-04517:1981*                       | $a, b, t_I, t_{II}, t_{III}$ | -              | -             | -               | <input type="checkbox"/>            |
| Coal type according to                      | PN-G-97002:2018-11                     | -                            | -              | -             | -               | <input type="checkbox"/>            |
| International classification of coal        | PN-ISO 11760:2007                      | -                            | -              | -             | -               | <input checked="" type="checkbox"/> |

The test results refer to sample delivered

The results of the tests relate to a sample taken by GIG samplers within the scope of accreditation AB 069

The results of the tests relate to a sample taken by GIG samplers outside the scope of accreditation AB 069

\*- standard withdrawn without replacement,

Without written permission of the Department this report can not be duplicated otherwise than in a complete form.

PO-13 - attachment 28, edition 2, page 1, valid from 14.01.2021

Form approved by: Head of Department

Report approved and authorized by:

**KIEROWNIK**  
Zakładu Oceny Jakości Paliw Stałych  
GŁÓWNEGO INSTYTUTU GÓRNICZWA

dr hab. Leokadia Rog, prof. GIG

**Customer: Department of Acoustics, Electronics and IT Solutions**  
**Central Mining Institute**

Analyses for particular research methods are made according to the standards and the instructions listed below:

| Determinations                             | Research methods                       | State                         |                               |                               |                               | Made according to                   |
|--------------------------------------------|----------------------------------------|-------------------------------|-------------------------------|-------------------------------|-------------------------------|-------------------------------------|
|                                            |                                        | As analysed                   | As received                   | Dry                           | Dry, Ash Free                 |                                     |
|                                            |                                        | Symbol                        |                               |                               |                               |                                     |
| Total sulphur content                      | PN-G-04584:2001                        | S <sub>t</sub> <sup>a</sup>   | S <sub>t</sub> <sup>r</sup>   | S <sub>t</sub> <sup>d</sup>   | -                             | <input checked="" type="checkbox"/> |
|                                            | PN-ISO 334:1997                        | w <sub>s</sub>                | w <sub>s,ar</sub>             | w <sub>s,d</sub>              | w <sub>s,daf</sub>            | <input type="checkbox"/>            |
| Ash sulphur content                        | PN-G-04584:2001                        | S <sub>A</sub> <sup>a</sup>   | S <sub>A</sub> <sup>r</sup>   | S <sub>A</sub> <sup>d</sup>   | -                             | <input checked="" type="checkbox"/> |
| Combustible sulphur content                | PN-G-04584:2001                        | S <sub>c</sub> <sup>a</sup>   | S <sub>c</sub> <sup>r</sup>   | S <sub>c</sub> <sup>d</sup>   | -                             | <input checked="" type="checkbox"/> |
| Pyritic sulphur content                    | PN-G-04582:1997                        | S <sub>p</sub> <sup>a</sup>   | S <sub>p</sub> <sup>r</sup>   | S <sub>p</sub> <sup>d</sup>   | -                             | <input type="checkbox"/>            |
| Sulphate sulphur content                   | PN-G-04582:1997                        | S <sub>SO4</sub> <sup>a</sup> | S <sub>SO4</sub> <sup>r</sup> | S <sub>SO4</sub> <sup>d</sup> | -                             | <input type="checkbox"/>            |
| Organic sulphur content                    | IC-29.1, edition 18 form 24.06.2019 r. | S <sub>o</sub> <sup>a</sup>   | S <sub>o</sub> <sup>r</sup>   | S <sub>o</sub> <sup>d</sup>   | -                             | <input type="checkbox"/>            |
| Total carbon content                       | PN-G-04571:1998                        | C <sub>t</sub> <sup>a</sup>   | C <sub>t</sub> <sup>r</sup>   | C <sub>t</sub> <sup>d</sup>   | -                             | <input checked="" type="checkbox"/> |
| Organic carbon content                     | IC-29.1, edition 18 form 24.06.2019 r. | C <sub>o</sub> <sup>a</sup>   | C <sub>o</sub> <sup>r</sup>   | C <sub>o</sub> <sup>d</sup>   | C <sub>o</sub> <sup>daf</sup> | <input type="checkbox"/>            |
| Total hydrogen content                     | PN-G-04571:1998                        | H <sub>t</sub> <sup>a</sup>   | H <sub>t</sub> <sup>r</sup>   | H <sub>t</sub> <sup>d</sup>   | -                             | <input checked="" type="checkbox"/> |
| Nitrogen content                           | PN-G-04571:1998                        | N <sup>a</sup>                | N <sup>r</sup>                | N <sup>d</sup>                | N <sup>daf</sup>              | <input checked="" type="checkbox"/> |
| Carbonate carbon dioxide content           | PN-ISO 925:2002                        | W <sub>CO2</sub>              | -                             | -                             | -                             | <input checked="" type="checkbox"/> |
| Carbonate carbon content                   | PN-ISO 925:2002                        | W <sub>C</sub>                | -                             | -                             | -                             | <input checked="" type="checkbox"/> |
| True relative density                      | PN-G-04537:1998                        | d <sub>r</sub> <sup>a</sup>   | -                             | -                             | -                             | <input checked="" type="checkbox"/> |
| Characteristic ash fusibility temperatures | PN-ISO 540:2001                        | DT, ST<br>HT, FT              | -                             | -                             | -                             | <input type="checkbox"/>            |
| Hardgrove grindability index               | PN-ISO 5074:2002                       | HGI                           | -                             | -                             | -                             | <input type="checkbox"/>            |
| Reflectance of vitrinite                   | PN-ISO 7404-5:2002                     | R, δ                          | -                             | -                             | -                             | <input checked="" type="checkbox"/> |
| Maceral groups composition                 | PN-ISO 7404-3:2001                     | V, L, I, MM                   | -                             | -                             | -                             | <input checked="" type="checkbox"/> |
| Fixed carbon index                         | PN-G-04516:1998                        | (fixed carbon) <sup>a</sup>   | -                             | -                             | -                             | <input checked="" type="checkbox"/> |
| Combustible parts content                  | IC-29.1, edition 18 form 24.06.2019 r. | -                             | -                             | -                             | -                             | <input checked="" type="checkbox"/> |
| Oxygen content                             | IC-29.1, edition 16 form 25.05.2018 r. | O <sub>d</sub> <sup>a</sup>   | O <sub>d</sub> <sup>r</sup>   | O <sub>d</sub> <sup>d</sup>   | O <sub>d</sub> <sup>daf</sup> | <input checked="" type="checkbox"/> |

\*- standard withdrawn without replacement

Without written permission of the Department this report can not be duplicated otherwise than in a complete form.

PO-13 - attachment 28, edition 2, page 2, valid from: 14.01.2021

Form approved by: Head of Department

Report approved and authorized by:

**KIEROWNIK**  
Zakładu Oceny Jakości Paliw Stałych  
GŁÓWNEGO INSTYTUTU GÓRNICTWA

dr hab. Leokadia Róg, prof. GiG



|                                                                                                                                                                                                                                                   |                                                                                                                                                                                                                 |                                                       |                                                                                     |                                                                                                                                                           |                                                                                                      |                                                       |                 |
|---------------------------------------------------------------------------------------------------------------------------------------------------------------------------------------------------------------------------------------------------|-----------------------------------------------------------------------------------------------------------------------------------------------------------------------------------------------------------------|-------------------------------------------------------|-------------------------------------------------------------------------------------|-----------------------------------------------------------------------------------------------------------------------------------------------------------|------------------------------------------------------------------------------------------------------|-------------------------------------------------------|-----------------|
|                                                                                                                                                                  | <b>Central Mining Institute</b><br><b>Department of Solid Fuels Quality Assessment</b><br>Plac Gwarków 1, 40-166 Katowice<br>telephone: 32/ 259-22-78, 259-22-76<br>fax.: 32/ 259-22-78<br>e-mail: l.rog@gig.eu |                                                       |  |                                                                                                                                                           | <br><b>AB 069</b> |                                                       |                 |
|                                                                                                                                                                                                                                                   | <b>PHYSICOCHEMICAL ANALYSIS</b><br><b>TEST REPORT 532/1/2021</b>                                                                                                                                                |                                                       | Page number : 3<br>Number of pages : 3<br>Katowice, date: 05.05.2021                |                                                                                                                                                           |                                                                                                      |                                                       |                 |
| <b>Customer:</b><br><b>Sample identification:</b><br><b>Sample customer description:</b><br><br><b>Sample identification number:</b>                                                                                                              | <b>Department of Acoustics, Electronics and IT Solutions</b><br>Sample: hard coal<br>Coal sample<br><br><div style="text-align: center; font-weight: bold;">SW 2182</div>                                       |                                                       |                                                                                     | <b>Date of sampling:</b><br><b>Date of delivery:</b><br><b>Date of test performance:</b><br><b>Customer sample number:</b><br><b>Package description:</b> | -<br>16.02.2021<br>16.02.-17.03.2021<br>-<br>Plastic bag                                             |                                                       |                 |
| Determinations                                                                                                                                                                                                                                    | Unit                                                                                                                                                                                                            | Delivered sample                                      | Enriched sample                                                                     | Determinations                                                                                                                                            | Unit                                                                                                 | Delivered sample                                      | Enriched sample |
|                                                                                                                                                                                                                                                   |                                                                                                                                                                                                                 | Result together with expanded uncertainty (k=2, P=95) |                                                                                     |                                                                                                                                                           |                                                                                                      | Result together with expanded uncertainty (k=2, P=95) |                 |
| <b>As analysed</b>                                                                                                                                                                                                                                |                                                                                                                                                                                                                 |                                                       |                                                                                     |                                                                                                                                                           |                                                                                                      |                                                       |                 |
| Moisture content in analytical sample                                                                                                                                                                                                             | %                                                                                                                                                                                                               | 5,06 ± 0,63                                           | -                                                                                   | Total sulphur content                                                                                                                                     | %                                                                                                    | 0,78 ± 0,08                                           | -               |
| Ash content                                                                                                                                                                                                                                       | %                                                                                                                                                                                                               | 4,80 ± 0,34                                           | -                                                                                   | Pyritic sulphur content                                                                                                                                   | %                                                                                                    | -                                                     | -               |
| Volatile matter content                                                                                                                                                                                                                           | %                                                                                                                                                                                                               | 33,94 ± 1,18                                          | -                                                                                   | Sulphate sulphur content                                                                                                                                  | %                                                                                                    | -                                                     | -               |
| Gross calorific value                                                                                                                                                                                                                             | kJ/kg                                                                                                                                                                                                           | 28617 ± 152                                           | -                                                                                   | Ash sulphur content                                                                                                                                       | %                                                                                                    | 0,14 ± 0,09                                           | -               |
| Net calorific value                                                                                                                                                                                                                               | kJ/kg                                                                                                                                                                                                           | 27465                                                 | -                                                                                   | Combustible sulphur content                                                                                                                               | %                                                                                                    | 0,64                                                  | -               |
| Caking power by Roga Index                                                                                                                                                                                                                        | -                                                                                                                                                                                                               | -                                                     | -                                                                                   | Organic sulphur content                                                                                                                                   | %                                                                                                    | -                                                     | -               |
| Crucible swelling number                                                                                                                                                                                                                          | -                                                                                                                                                                                                               | 0 ± 1                                                 | -                                                                                   | Total carbon content                                                                                                                                      | %                                                                                                    | 71,50 ± 1,05                                          | -               |
| Dilatometric indices                                                                                                                                                                                                                              | contraction                                                                                                                                                                                                     | %                                                     | -                                                                                   | Organic carbon content                                                                                                                                    | %                                                                                                    | -                                                     | -               |
|                                                                                                                                                                                                                                                   | dilatation                                                                                                                                                                                                      | %                                                     | -                                                                                   | Total hydrogen content                                                                                                                                    | %                                                                                                    | 4,71 ± 0,40                                           | -               |
|                                                                                                                                                                                                                                                   | Temperature:                                                                                                                                                                                                    |                                                       |                                                                                     | Nitrogen content                                                                                                                                          | %                                                                                                    | 1,40 ± 0,22                                           | -               |
|                                                                                                                                                                                                                                                   | softening                                                                                                                                                                                                       | °C                                                    | -                                                                                   | Oxygen content                                                                                                                                            | %                                                                                                    | 11,89                                                 | -               |
|                                                                                                                                                                                                                                                   | contraction                                                                                                                                                                                                     | °C                                                    | -                                                                                   | Carbonate carbon dioxide content                                                                                                                          | %                                                                                                    | 0,04** ± 0,02                                         | -               |
|                                                                                                                                                                                                                                                   | dilatation                                                                                                                                                                                                      | °C                                                    | -                                                                                   | Carbonate carbon content                                                                                                                                  | %                                                                                                    | 0,01                                                  | -               |
| Ash fusibility temperatures                                                                                                                                                                                                                       | Atmosphere:                                                                                                                                                                                                     |                                                       | oxidizing*                                                                          | reducing*                                                                                                                                                 | True relative density                                                                                | g/cm <sup>3</sup>                                     | 1,388 ± 0,18    |
|                                                                                                                                                                                                                                                   | deformation                                                                                                                                                                                                     | °C                                                    | -                                                                                   | -                                                                                                                                                         | Hardgrove grindability index                                                                         | -                                                     | -               |
|                                                                                                                                                                                                                                                   | softening                                                                                                                                                                                                       | °C                                                    | -                                                                                   | -                                                                                                                                                         | Reflectance of vitrinite R                                                                           | %                                                     | 0,57 ± 0,03     |
|                                                                                                                                                                                                                                                   | melting                                                                                                                                                                                                         | °C                                                    | -                                                                                   | -                                                                                                                                                         | Standard deviation R                                                                                 | %                                                     | 0,05            |
|                                                                                                                                                                                                                                                   | flow                                                                                                                                                                                                            | °C                                                    | -                                                                                   | -                                                                                                                                                         | Vitrinite content                                                                                    | %                                                     | 64 ± 7          |
|                                                                                                                                                                                                                                                   |                                                                                                                                                                                                                 |                                                       |                                                                                     |                                                                                                                                                           | Liptinite (exinite) content                                                                          | %                                                     | 10 ± 7          |
| Fixed carbon index                                                                                                                                                                                                                                | %                                                                                                                                                                                                               | 56,20                                                 | -                                                                                   | Inertinite content                                                                                                                                        | %                                                                                                    | 12 ± 7                                                |                 |
|                                                                                                                                                                                                                                                   |                                                                                                                                                                                                                 |                                                       |                                                                                     | Mineral matter content                                                                                                                                    | %                                                                                                    | 14 ± 9                                                | -               |
|                                                                                                                                                                                                                                                   |                                                                                                                                                                                                                 |                                                       |                                                                                     | Combustible parts content                                                                                                                                 | %                                                                                                    | -                                                     | -               |
| <b>As received</b>                                                                                                                                                                                                                                |                                                                                                                                                                                                                 |                                                       |                                                                                     |                                                                                                                                                           |                                                                                                      |                                                       |                 |
| Transient moisture content                                                                                                                                                                                                                        | %                                                                                                                                                                                                               | 2,61                                                  | -                                                                                   | Volatile matter content                                                                                                                                   | %                                                                                                    | 33,05                                                 | -               |
| Total moisture content                                                                                                                                                                                                                            | %                                                                                                                                                                                                               | 7,54                                                  | -                                                                                   | Total sulphur content                                                                                                                                     | %                                                                                                    | 0,76                                                  | -               |
| Ash content                                                                                                                                                                                                                                       | %                                                                                                                                                                                                               | 4,67                                                  | -                                                                                   | Net calorific value                                                                                                                                       | kJ/kg                                                                                                | 26684                                                 | -               |
| <b>Dry</b>                                                                                                                                                                                                                                        |                                                                                                                                                                                                                 |                                                       |                                                                                     |                                                                                                                                                           |                                                                                                      |                                                       |                 |
| Ash content                                                                                                                                                                                                                                       | %                                                                                                                                                                                                               | 5,06                                                  | -                                                                                   | Gross calorific value                                                                                                                                     | kJ/kg                                                                                                | -                                                     | -               |
| Total sulphur content                                                                                                                                                                                                                             | %                                                                                                                                                                                                               | 0,82                                                  | -                                                                                   | Net calorific value                                                                                                                                       | kJ/kg                                                                                                | -                                                     | -               |
| <b>Dry, Ash Free</b>                                                                                                                                                                                                                              |                                                                                                                                                                                                                 |                                                       |                                                                                     |                                                                                                                                                           |                                                                                                      |                                                       |                 |
| Volatile matter content                                                                                                                                                                                                                           | %                                                                                                                                                                                                               | 37,65                                                 | -                                                                                   | Gross calorific value                                                                                                                                     | kJ/kg                                                                                                | 31747                                                 | -               |
| Coal type according to                                                                                                                                                                                                                            | -                                                                                                                                                                                                               | -                                                     | -                                                                                   | International classification of coal                                                                                                                      | <b>05 0 1 3 0 36 05 08 31</b>                                                                        |                                                       |                 |
| Extended uncertainty applies only to measurement results.<br>Without written permission of the Department this report can not be duplicated otherwise than in a complete form.<br>PO-13 - attachment 28, edition 2, page 3, valid from 14.01.2021 |                                                                                                                                                                                                                 |                                                       |                                                                                     |                                                                                                                                                           |                                                                                                      |                                                       |                 |

\* oxidizing atmosphere - air, reducing atmosphere - CO+CO<sub>2</sub> mixture in voluminal ratio 3:2

\*\* Measurement result made by accredited method outside the measurement range

The annex to the test report: reflectogram

Combustible parts content 90,14 %

Report approved and authorized by:

**KIEROWNIK**  
 Zakładu Oceny Jakości Paliw Stałych  
 GŁÓWNEGO INSTYTUTU GÓRNICTWA  
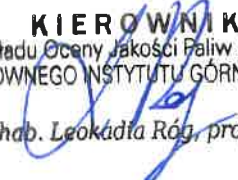  
 dr hab. Leokadia Rog, prof. GIG
