# Supplementary material
Source: MDPI journal article supplement (https://www.mdpi.com/1996-1073/16/20/7217)
Supplement: s1 [file s1]

**Table S9.** The results of CO<sub>2</sub> concentration in soil gas based on measurements series from 21.11. to 26.11.2022

| No. of<br>piezometer | CO <sub>2</sub> concentration in soil gas [ppm] |            |            |            |            |            | average value |
|----------------------|-------------------------------------------------|------------|------------|------------|------------|------------|---------------|
|                      | 21.11.2022                                      | 22.11.2022 | 23.11.2022 | 24.11.2022 | 25.11.2022 | 26.11.2022 |               |
| 1                    | 9,190.0                                         | 12,241.0   | 647.5      | 788.0      | 1,012.8    | 13,430.0   | 6,218.2       |
| 2                    | -                                               | -          | -          | -          | -          | -          | -             |
| 3                    | 3,574.4                                         | 2,801.0    | 17,982.0   | 13,408.0   | 12,022.0   | 16,035.0   | 10,970.4      |
| 4                    | 12,290.0                                        | 5,818.2    | 890.0      | 3,611.5    | 22,460.0   | 16,841.0   | 10,318.5      |
| 5                    | 18,340.0                                        | 3,822.7    | 717.6      | 648.3      | 475.3      | 724.4      | 4,121.4       |
| 6                    | 6,106.6                                         | 8,053.0    | 23,579.0   | 22,688.0   | 24,882.0   | 1,099.1    | 14,401.3      |
| 2201                 | 13,636.0                                        | 10,109.0   | 5,322.1    | 3,647.4    | 4,133.6    | 8,832.0    | 7,613.4       |
| 2202                 | 6,019.7                                         | 8,811.9    | 16,194.0   | 22,876.0   | 17,137.0   | 13,708.0   | 14,124.4      |
| 2203                 | 9,820.0                                         | 13,333.0   | 8,272.6    | 8,769.6    | 7,827.3    | 5,713.1    | 8,955.9       |
| 2204                 | 4,504.3                                         | 18,436.0   | 13,267.0   | 18,689.0   | 14,796.0   | 1,318.4    | 11,835.1      |
| 2205                 | 7,251.3                                         | 11,141.0   | 12,738.0   | 15,122.0   | 13,500.0   | 13,916.0   | 12,278.1      |
| 2206                 | 15,181.0                                        | 14,435.0   | 11,806.0   | 8,072.5    | 9,232.0    | 8,342.6    | 11,178.2      |
| 2207                 | 16,770.0                                        | 16,660.0   | 19,536.0   | 10,508.0   | 12,303.0   | 15,592.0   | 15,228.2      |
| 2208                 | 11,129.0                                        | 12,599.0   | 22,305.0   | 21,552.0   | 26,504.0   | 23,386.0   | 19,579.2      |
| 2209                 | 4,207.5                                         | 9,698.0    | 17,940.0   | 18,049.0   | 18,931.0   | 22,134.0   | 15,159.9      |
| 2210                 | 6,579.1                                         | 7,329.0    | 1,594.4    | 11,036.0   | 20,802.0   | 16,921.0   | 10,710.3      |
| 2211                 | 8,566.0                                         | 19,679.0   | 39,219.0   | 41,132.0   | 49,377.0   | 380.8      | 26,392.3      |
| 2212                 | 17,310.0                                        | 1,466.8    | 20,573.0   | 21,495.0   | 24,594.0   | 19,502.0   | 17,490.1      |
| 2213                 | 11,234.0                                        | 13,223.0   | 12,158.0   | 17,074.0   | 17,968.0   | 15,691.0   | 14,558.0      |
| 2214                 | 12,775.0                                        | 12,414.0   | 9,513.0    | 9,946.0    | 10,433.0   | 10,641.0   | 10,953.7      |
| 2215                 | 12,650.0                                        | 12,043.0   | 4,065.3    | 6,883.7    | 4,758.7    | 10,992.0   | 8,565.5       |
| 2216                 | 11,234.0                                        | 291.1      | 1,071.6    | 527.2      | 626.5      | 876.1      | 2,437.8       |
| 2217                 | 10,121.0                                        | 15,631.0   | 13,318.0   | 13,416.0   | 13,229.0   | 13,479.0   | 13,199.0      |
| 2218                 | 8,321.2                                         | 12,861.0   | 17,071.0   | 13,258.0   | 13,733.0   | 15,336.0   | 13,430.0      |
| 2219                 | 8,307.7                                         | 12,826.0   | 19,542.0   | 20,353.0   | 20,889.0   | 20,421.0   | 17,056.5      |
| 2220                 | 11,175.0                                        | 2,021.7    | 13,163.0   | 10,410.0   | 15,373.0   | 7,089.9    | 9,872.1       |
| 2221                 | 2,776.7                                         | 1,052.4    | 17,723.0   | 19,211.0   | 26,416.0   | 15,389.0   | 13,761.4      |
| 2222                 | 6,266.3                                         | 15,458.0   | 743.8      | 1,231.4    | 15,583.0   | 3,369.5    | 7,108.7       |
| 2223                 | 9,081.7                                         | 8,046.1    | 5,877.5    | 8,314.5    | 12,829.0   | 24,934.0   | 11,513.8      |
| 2224                 | 16,770.0                                        | 993.5      | 16,154.0   | 19,278.0   | 21,140.0   | 13,626.0   | 14,660.3      |
| 2225                 | 10,741.0                                        | 2,225.0    | 18,398.0   | 19,251.0   | 36,718.0   | 32,021.0   | 19,892.3      |
| 2226                 | 5,728.3                                         | 7,497.7    | 14,404.0   | 16,753.0   | 17,540.0   | 14,716.0   | 12,773.2      |
| 2227                 | 6,336.3                                         | 9,115.0    | 4,248.6    | 5,224.4    | 9,462.0    | 9,571.0    | 7,326.2       |
| 2228                 | 11,162.0                                        | 11,527.0   | 6,416.4    | 6,708.1    | 10,198.0   | 10,641.0   | 9,442.1       |
| 2229                 | 3,283.6                                         | 3,384.8    | 26,652.0   | 2,696.8    | 40,023.0   | 23,929.0   | 16,661.5      |
| 2230                 | 527.1                                           | 19,478.0   | 1,054.8    | 15,320.0   | 6,852.2    | 9,645.0    | 8,812.9       |
| 2231                 | 12,438.0                                        | 13,917.0   | 2,377.2    | 2,661.7    | 11,327.0   | 16,098.0   | 9,803.2       |
| 2232                 | 13,098.0                                        | 15,030.0   | 10,865.0   | 12,061.0   | 12,717.0   | 11,798.0   | 12,594.8      |
| 2233                 | 13,756.0                                        | 13,927.0   | 5,205.0    | 33,971.0   | 6,128.5    | 8,732.5    | 13,620.0      |
| 2234                 | 7,838.9                                         | 15,047.0   | 10,869.0   | 9,094.0    | 9,222.0    | 1,095.1    | 8,861.0       |
| 2235                 | 1,981.8                                         | 18,101.0   | 13,140.0   | 13,015.0   | 15,875.0   | 7,582.9    | 11,616.0      |
| 2236                 | 15,941.0                                        | 19,191.0   | 15,493.0   | 13,743.0   | 15,989.0   | 17,084.0   | 16,240.2      |
| 2237                 | 9,633.0                                         | 13,690.0   | 18,207.0   | 8,094.3    | 10,421.0   | 8,599.1    | 11,440.7      |

**Table S10.** The results of CO<sub>2</sub> concentration in soil gas based on measurements series performed from 28.11.2022 to 02.12.2022

| No. of<br>piezometer | CO <sub>2</sub> concentration in soil gas [ppm] |            |            |            |            | average value |
|----------------------|-------------------------------------------------|------------|------------|------------|------------|---------------|
|                      | 28.11.2022                                      | 29.11.2022 | 30.11.2022 | 01.12.2022 | 02.12.2022 |               |
| 1                    | 13,430.0                                        | 3,152.9    | 532.8      | 679.8      | 3,780.9    | 4,315.3       |
| 2                    | -                                               | -          | -          | -          | -          | -             |
| 3                    | 16,035.0                                        | 9,496.0    | 9,923.0    | 9,125.0    | 9,324.0    | 10,780.6      |
| 4                    | 16,841.0                                        | 6,639.8    | 9,609.0    | 17,092.0   | 7,783.6    | 11,593.1      |
| 5                    | 724.4                                           | 8,320.1    | 526.4      | 771.7      | 498.8      | 2,168.3       |
| 6                    | 1,099.1                                         | 29,092.0   | 26,081.0   | 25,004.0   | 18,575.0   | 19,970.2      |
| 2201                 | 8,832.0                                         | 2,261.3    | 3,494.7    | 3,041.2    | 3,461.9    | 4,218.2       |
| 2202                 | 13,708.0                                        | 14,846.0   | 14,039.0   | 17,789.0   | 13,807.0   | 14,837.8      |
| 2203                 | 5,713.1                                         | 2,611.9    | 6,716.0    | 7,460.7    | 5,324.0    | 5,565.1       |
| 2204                 | 1,318.4                                         | 12,239.0   | 9,556.0    | 16,553.0   | 14,439.0   | 10,821.1      |
| 2205                 | 13,916.0                                        | 12,064.0   | 10,105.0   | 10,452.0   | 9,953.0    | 11,298.0      |
| 2206                 | 8,342.6                                         | 8,210.9    | 6,796.4    | 5,728.3    | 8,020.1    | 7,419.7       |
| 2207                 | 15,592.0                                        | 8,063.3    | 9,739.0    | 9,520.0    | 10,625.0   | 10,707.9      |
| 2208                 | 23,386.0                                        | 20,354.0   | 9,773.0    | 14,716.0   | 18,096.0   | 17,265.0      |
| 2209                 | 22,134.0                                        | 16,977.0   | 5,574.8    | 15,864.0   | 14,326.0   | 14,975.2      |
| 2210                 | 16,921.0                                        | 13,028.0   | 6,885.9    | 11,844.0   | 8,800.7    | 11,495.9      |
| 2211                 | 380.8                                           | 3,511.1    | 789.9      | 347.8      | 358.8      | 1,077.7       |
| 2212                 | 19,502.0                                        | 19,961.0   | 11,142.0   | 17,621.0   | 16,729.0   | 16,991.0      |
| 2213                 | 15,691.0                                        | 10,593.0   | 13,660.0   | 10,215.0   | 11,224.0   | 12,276.6      |
| 2214                 | 10,641.0                                        | 4,601.9    | 4,614.4    | 7,718.7    | 5,012.4    | 6,517.7       |
| 2215                 | 10,992.0                                        | 4,066.7    | 1,880.0    | 2,647.5    | 1,749.4    | 4,267.1       |
| 2216                 | 876.1                                           | 4,534.2    | 415.3      | 478.2      | 465.3      | 1,353.8       |
| 2217                 | 13,479.0                                        | 8,846.9    | 7,016.4    | 10,644.0   | 6,070.4    | 9,211.3       |
| 2218                 | 15,336.0                                        | 14,217.0   | 7,061.2    | 10,628.0   | 15,385.0   | 12,525.4      |
| 2219                 | 20,421.0                                        | 11,423.0   | 9,066.0    | 18,555.0   | 13,822.0   | 14,657.4      |
| 2220                 | 7,089.9                                         | 6,986.5    | 6,033.5    | 12,446.0   | 9,328.0    | 8,376.8       |
| 2221                 | 15,389.0                                        | 18,813.0   | 20,355.0   | 22,782.0   | 16,996.0   | 18,867.0      |
| 2222                 | 3,369.5                                         | 1,177.4    | 672.7      | 866.6      | 14,736.0   | 4,164.4       |
| 2223                 | 24,934.0                                        | 3,375.6    | 4,872.5    | 6,336.9    | 3,359.0    | 8,575.6       |
| 2224                 | 13,626.0                                        | 9,863.0    | 9,286.0    | 20,235.0   | 18,253.0   | 14,252.6      |
| 2225                 | 32,021.0                                        | 22,302.0   | 17,451.0   | 21,445.0   | 16,739.0   | 21,991.6      |
| 2226                 | 14,716.0                                        | 17,779.0   | 7,879.3    | 12,486.0   | 8,537.1    | 12,279.5      |
| 2227                 | 9,571.0                                         | 12,190.0   | 4,143.5    | 3,283.4    | 3,423.1    | 6,522.2       |
| 2228                 | 10,641.0                                        | 7,638.9    | 9,686.0    | 7,301.3    | 7,444.2    | 8,542.3       |
| 2229                 | 23,929.0                                        | 24,572.0   | 25,770.0   | 27,387.0   | 30,199.5   | 26,371.5      |
| 2230                 | 9,645.0                                         | 16,034.0   | 629.7      | 505.2      | 422.5      | 5,447.3       |
| 2231                 | 16,098.0                                        | 4,721.5    | 1,974.4    | 2,005.3    | 2,028.3    | 5,365.5       |
| 2232                 | 11,798.0                                        | 8,035.6    | 8,780.0    | 8,178.5    | 7,866.1    | 8,931.6       |
| 2233                 | 8,732.5                                         | 4,777.0    | 6,106.8    | 2,233.0    | 4,930.6    | 5,356.0       |
| 2234                 | 1,095.1                                         | 6,443.2    | 3,913.0    | 7,375.9    | 6,761.4    | 5,117.7       |
| 2235                 | 7,582.9                                         | 5,398.0    | 11,187.0   | 13,153.0   | 12,628.0   | 9,989.8       |
| 2236                 | 17,084.0                                        | 13,424.0   | 11,699.0   | 14,403.0   | 15,198.0   | 14,361.6      |
| 2237                 | 8,599.1                                         | 4,635.5    | 10,719.0   | 9,960.0    | 8,791.9    | 8,541.1       |

**Table S11.** The results of CO<sub>2</sub> concentration in soil gas in additional piezometers drilled in 2022 based on measurements series performed from 21.11. to 26.11.2022

| No. of<br>piezometer | CO <sub>2</sub> concentration in soil gas [ppm] |            |            |            |            |            | average value |
|----------------------|-------------------------------------------------|------------|------------|------------|------------|------------|---------------|
|                      | 21.11.2022                                      | 22.11.2022 | 23.11.2022 | 24.11.2022 | 25.11.2022 | 26.11.2022 |               |
| ST1_1                | 4,477.4                                         | 760.1      | 1,531.2    | 15,700.0   | 16,911.0   | 4,316.1    | 7,282.6       |
| ST1_2                | 4,854.0                                         | 2,294.3    | 23,450.0   | 26,912.0   | 25,392.0   | 11,347.0   | 15,708.2      |
| ST1_3                | 12,575.0                                        | 9,049.0    | 8,447.3    | 8,605.3    | 9,358.0    | 4,783.4    | 8,803.0       |
| ST1_4                | 2,473.6                                         | 813.2      | 1,970.5    | 2,022.1    | 2,046.7    | 1,660.3    | 1,831.1       |
| ST1_5                | 6,644.6                                         | 3,650.5    | 1,736.7    | 1,531.4    | 1,729.1    | 1,768.5    | 2,843.5       |
| ST1_6                | 12,865.0                                        | 1,639.2    | 4,610.8    | 5,976.7    | 5,881.1    | 4,253.9    | 5,871.1       |
| ST2_1                | 990.9                                           | 2,175.8    | 424.1      | 375.5      | 346.8      | 621.1      | 822.4         |
| ST2_2                | 1,856.9                                         | 7,929.9    | 351.2      | 329.7      | 358.5      | 440.9      | 1,877.9       |
| ST2_3                | 4,474.0                                         | 13,497.0   | 11,931.0   | 1,097.1    | 14,413.0   | 403.4      | 7,635.9       |
| ST2_4                | 10,452.0                                        | 7,058.4    | 33,490.0   | 34,959.0   | 37,554.0   | 6,083.5    | 21,599.5      |
| ST2_5                | 11,772.0                                        | 4,461.4    | 14,080.0   | 13,428.0   | 17,741.0   | 13,396.0   | 12,479.7      |
| ST2_6                | 20,153.0                                        | 23,224.0   | 7,458.3    | 1,320.5    | 19,568.0   | 1,029.3    | 12,125.5      |

**Table S12.** The results of CO<sub>2</sub> concentration in soil gas in additional piezometers drilled in 2022 based on measurements series performed from 28.11.2022 to 02.12.2022

| No. of<br>piezometer | CO <sub>2</sub> concentration in soil gas [ppm] |            |            |            |            | average value |
|----------------------|-------------------------------------------------|------------|------------|------------|------------|---------------|
|                      | 28.11.2022                                      | 29.11.2022 | 30.11.2022 | 01.12.2022 | 02.12.2022 |               |
| ST1_1                | 4,316.1                                         | 5,043.4    | 8,172.1    | 4,731.2    | 9,579.0    | 6,368.4       |
| ST1_2                | 11,347.0                                        | 15,232.0   | 11,483.0   | 24,156.0   | 12,795.0   | 15,002.6      |
| ST1_3                | 4,783.4                                         | 6,988.0    | 4,057.5    | 4,342.0    | 4,853.5    | 5,004.9       |
| ST1_4                | 1,660.3                                         | 1,852.5    | 1,742.8    | 1,542.3    | 1,670.1    | 1,693.6       |
| ST1_5                | 1,768.5                                         | 1,557.3    | 1,456.6    | 1,627.2    | 1,746.3    | 1,631.2       |
| ST1_6                | 4,253.9                                         | 5,039.5    | 4,561.4    | 5,970.5    | 6,220.7    | 5,209.2       |
| ST2_1                | 621.1                                           | 1,136.5    | 298.1      | 347.0      | 310.0      | 542.5         |
| ST2_2                | 440.9                                           | 817.7      | 363.4      | 363.0      | 300.2      | 457.0         |
| ST2_3                | 403.4                                           | 722.4      | 794.4      | 954.5      | 1,020.9    | 779.1         |
| ST2_4                | 6,083.5                                         | 23,823.0   | 31,256.0   | 30,189.0   | 37,384.0   | 25,747.1      |
| ST2_5                | 13,396.0                                        | 16,015.0   | 2,032.9    | 2,580.1    | 3,873.5    | 7,579.5       |
| ST2_6                | 1,029.3                                         | 1,880.9    | 642.9      | 626.1      | 668.4      | 969.5         |
