# Supplementary material
Source: MDPI journal article supplement (https://www.mdpi.com/1996-1073/16/20/7217)
Supplement: s1 [file s1]

**Table S15.** The results of CO<sub>2</sub> concentration in the accumulation chamber. The values of the total CO<sub>2</sub> flux and the atmospheric conditions of the measurements from 21.11.2022 to 25.11.2022

| Date       | point no. | CO <sub>2</sub> concentration [%vol] | CO <sub>2</sub> concentration in the accumulation chamber [ppm] |       |       |       |        |        |        | CO <sub>2</sub> stream | Measurement conditions |          |        |          |                     |                     |
|------------|-----------|--------------------------------------|-----------------------------------------------------------------|-------|-------|-------|--------|--------|--------|------------------------|------------------------|----------|--------|----------|---------------------|---------------------|
|            |           | depth = 1.50 m                       | 0 min                                                           | 1 min | 2 min | 3 min | 4 min  | 5 min  | 6 min  | g/m <sup>2</sup> /d    | TP [K]                 | Pp [bar] | Tn [K] | Pn [bar] | V [m <sup>3</sup> ] | F [m <sup>2</sup> ] |
| 21.11.2022 | 2202      | 0.60                                 | 350.0                                                           | 408.2 | 4.01  | 484.3 | 523.9  | 548.5  | 558.1  | 4.01                   |                        | 0.969    |        |          |                     |                     |
|            | 2217      | 1.01                                 | 338.2                                                           | 395.0 | 4.19  | 481.3 | 502.3  | 520.3  | 571.6  | 4.19                   |                        | 0.969    |        |          |                     |                     |
|            | 2219      | 0.83                                 | 354.4                                                           | 422.3 | 5.17  | 528.9 | 567.2  | 604.0  | 628.5  | 5.17                   | 277.15                 | 0.970    | 273.15 | 1.01325  | 0.005667            | 0.133354            |
|            | 2226      | 0.57                                 | 329.9                                                           | 356.6 | 2.38  | 408.2 | 423.7  | 439.3  | 454.9  | 2.38                   |                        | 0.970    |        |          |                     |                     |
|            | 2229      | 0.33                                 | 358.5                                                           | 484.9 | 11.55 | 716.3 | 807.5  | 896.5  | 968.8  | 11.55                  |                        | 0.970    |        |          |                     |                     |
| 22.11.2022 | 2202      | 0.88                                 | 311.7                                                           | 362.3 | 398.4 | 445.5 | 480.0  | 510.9  | 546.1  | 4.17                   |                        | 0.969    |        |          |                     |                     |
|            | 2217      | 1.56                                 | 323.0                                                           | 348.1 | 370.9 | 398.1 | 417.9  | 435.2  | 452.8  | 2.49                   |                        | 0.968    |        |          |                     |                     |
|            | 2219      | 1.28                                 | 306.8                                                           | 327   | 349.6 | 370.9 | 386.5  | 401.5  | 414.1  | 2.07                   | 277.15                 | 0.968    | 273.15 | 1.01325  | 0.005667            | 0.133354            |
|            | 2226      | 0.75                                 | 320.4                                                           | 334.5 | 348.4 | 360.4 | 372.1  | 380.1  | 389.9  | 1.34                   |                        | 0.978    |        |          |                     |                     |
|            | 2229      | 0.34                                 | 328.2                                                           | 439.5 | 537.8 | 624.0 | 709.7  | 788.3  | 864.8  | 10.23                  |                        | 0.967    |        |          |                     |                     |
| 23.11.2022 | 2202      | 1.62                                 | 345.1                                                           | 381.7 | 400.3 | 420.8 | 439.2  | 451.8  | 466.9  | 2.25                   |                        | 0.970    |        |          |                     |                     |
|            | 2217      | 1.33                                 | 317.2                                                           | 357.6 | 395.6 | 418.8 | 442.5  | 460.1  | 479.9  | 3.05                   |                        | 0.969    |        |          |                     |                     |
|            | 2219      | 1.95                                 | 326.0                                                           | 343.1 | 363.2 | 377.9 | 393.9  | 409.7  | 419.4  | 2.1                    | 276.15                 | 0.968    | 273.15 | 1.01325  | 0.005667            | 0.133354            |
|            | 2226      | 1.44                                 | 297.7                                                           | 315.4 | 333.4 | 345.3 | 363.7  | 378.0  | 390.4  | 1.35                   |                        | 0.968    |        |          |                     |                     |
|            | 2229      | 2.67                                 | 385.8                                                           | 408.0 | 444.2 | 478.0 | 497.0  | 524.8  | 541.0  | 10.14                  |                        | 0.968    |        |          |                     |                     |
| 24.11.2022 | 2208      | 2.16                                 | 487.5                                                           | 682.1 | 844.9 | 976.9 | 1126.4 | 1254.5 | 1386.6 | 16.99                  |                        | 0.975    |        |          |                     |                     |
|            | 2219      | 2.04                                 | 344.6                                                           | 367.4 | 389.4 | 412.4 | 434.1  | 452.8  | 474.8  | 2.52                   |                        | 0.973    |        |          |                     |                     |
|            | 6         | 2.27                                 | 345.6                                                           | 460.1 | 557.2 | 626   | 690.6  | 739.8  | 783.1  | 8.24                   | 274.15                 | 0.971    | 273.15 | 1.01325  | 0.005667            | 0.133354            |
|            | ST1_2     | 2.69                                 | 323.1                                                           | 343.1 | 364.2 | 365.8 | 373.4  | 377.6  | 385.5  | 1.11                   |                        | 0.972    |        |          |                     |                     |
|            | ST2_4     | 3.50                                 | 426.7                                                           | 428.4 | 446.5 | 482.0 | 491.6  | 495.4  | 535.2  | 2.11                   |                        | 0.975    |        |          |                     |                     |
| 25.11.2022 | 2202      | 1.71                                 | 398.0                                                           | 550.4 | 842.6 | 959.8 | 1149.5 | 1244.6 | 1325.8 | 18.28                  |                        | 0.980    |        | 0.98021  |                     |                     |
|            | 2217      | 1.32                                 | 369.1                                                           | 556.3 | 739.7 | 893.8 | 1027.5 | 1147.3 | 1252.6 | 16.82                  |                        | 0.980    |        | 0.98025  |                     |                     |
|            | 2219      | 2.09                                 | 392.4                                                           | 478.1 | 558.0 | 642.0 | 720.5  | 790.3  | 853.8  | 8.88                   | 278.15                 | 0.981    | 278.15 | 0.98087  | 0.005667            | 0.133354            |
|            | 2226      | 1.75                                 | 327.8                                                           | 345.1 | 361.2 | 379.0 | 390.6  | 404.9  | 421.2  | 1.78                   |                        | 0.981    |        | 0.98099  |                     |                     |
|            | 2229      | 4.02                                 | 338.1                                                           | 362.8 | 401.3 | 435.1 | 478.2  | 515.4  | 539.8  | 4.05                   |                        | 0.981    |        | 0.98132  |                     |                     |

**Table S16.** The results of CO<sub>2</sub> concentration in the accumulation chamber. The values of the total CO<sub>2</sub> flux and the atmospheric conditions of the measurements from 26.11.2022 to 02.12.2022

| Date       | point no. | CO <sub>2</sub> concentration [%vol] | CO <sub>2</sub> concentration in the accumulation chamber [ppm] |       |        |        |        |        |        | CO <sub>2</sub> stream | Measurement conditions |          |        |          |                     |                     |
|------------|-----------|--------------------------------------|-----------------------------------------------------------------|-------|--------|--------|--------|--------|--------|------------------------|------------------------|----------|--------|----------|---------------------|---------------------|
|            |           | depth = 1.50 m                       | 0 min                                                           | 1 min | 2 min  | 3 min  | 4 min  | 5 min  | 6 min  | g/m <sup>2</sup> /d    | Tp [K]                 | Pp [bar] | Tn [K] | Pn [bar] | V [m <sup>3</sup> ] | F [m <sup>2</sup> ] |
| 26.11.2022 | 2202      | 1.37                                 | 394.1                                                           | 417.9 | 449.6  | 470.8  | 483.8  | 492.5  | 516.8  | 2.28                   |                        | 0.989    |        | 0.98021  |                     |                     |
|            | 2217      | 1.35                                 | 448.9                                                           | 480.0 | 505.3  | 542.6  | 556.5  | 559.5  | 574.4  | 2.43                   | 278.15                 | 0.989    |        | 0.98025  |                     |                     |
|            | 2219      | 2.04                                 | 410.9                                                           | 462.2 | 510.4  | 555.4  | 595.3  | 630.3  | 655.9  | 4.75                   |                        | 0.987    | 278.15 | 0.98087  | 0.005667            | 0.133354            |
|            | 2226      | 1.47                                 | 326.0                                                           | 345.0 | 354.2  | 365.8  | 376.3  | 383.6  | 394.9  | 1.27                   |                        | 0.989    |        | 0.98099  |                     |                     |
|            | 2229      | 2.39                                 | 782.7                                                           | 882.0 | 1039.7 | 1219.0 | 1367.5 | 1493.6 | 1602.4 | 16.42                  |                        | 0.986    |        | 0.98132  |                     |                     |
| 28.11.2022 | 2202      | 1.54                                 | 333.5                                                           | 360.2 | 381.2  | 386.5  | 402.9  | 413.5  | 418.9  | 20.1                   |                        | 0.985    |        |          |                     |                     |
|            | 2217      | 1.17                                 | 354.2                                                           | 364.9 | 384.4  | 392.8  | 406.0  | 408.0  | 414.2  | 15.15                  | 277.15                 | 0.985    |        |          |                     |                     |
|            | 2219      | 1.70                                 | 333.5                                                           | 345.6 | 360.9  | 372.6  | 379.0  | 384.5  | 389.0  | 13.82                  |                        | 0.985    | 273.15 | 1.02025  | 0.005667            | 0.133354            |
|            | 2226      | 1.38                                 | 350.4                                                           | 370.4 | 386.6  | 404.3  | 414.5  | 423.2  | 438.9  | 20.86                  |                        | 0.985    |        |          |                     |                     |
|            | 2229      | 2.45                                 | 425.7                                                           | 450.9 | 488.1  | 520.7  | 545.3  | 563.9  | 585.7  | 39.65                  |                        | 0.983    |        |          |                     |                     |
| 29.11.2022 | 2202      | 1.48                                 | 328.1                                                           | 334.7 | 345.8  | 353.1  | 363.6  | 374.0  | 384.2  | 13.93                  |                        | 0.986    |        |          |                     |                     |
|            | 2217      | 0.88                                 | 310.5                                                           | 319.2 | 329.3  | 341.5  | 348.2  | 359.9  | 374.1  | 15.27                  |                        | 0.986    |        |          |                     |                     |
|            | 2219      | 1.14                                 | 329.3                                                           | 343.1 | 359.5  | 380.1  | 392.5  | 408.7  | 425.0  | 23.52                  | 276.15                 | 0.986    | 273.15 | 1.02025  | 0.005667            | 0.133354            |
|            | 2226      | 1.78                                 | 318.3                                                           | 327.2 | 327.2  | 335.0  | 341.1  | 345.9  | 353.8  | 361.1                  |                        | 0.986    |        |          |                     |                     |
|            | 2229      | 2.46                                 | 497.4                                                           | 528.1 | 549.9  | 572.9  | 594.5  | 610.5  | 638.0  | 32.94                  |                        | 0.983    |        |          |                     |                     |
| 30.11.2022 | 2202      | 1.40                                 | 300.8                                                           | 365.6 | 427.6  | 517.5  | 584.1  | 650.7  | 708.2  | 8.00                   |                        | 0.986    |        |          |                     |                     |
|            | 2217      | 0.70                                 | 279.5                                                           | 307.7 | 359.5  | 402.4  | 435.6  | 470.1  | 495.0  | 4.34                   |                        | 0.986    |        |          |                     |                     |
|            | 2219      | 0.91                                 | 311.0                                                           | 358.8 | 420.2  | 479.7  | 540.4  | 597.6  | 655.3  | 6.75                   | 276.15                 | 0.986    | 273.15 | 1.02025  | 0.005667            | 0.133354            |
|            | 2226      | 0.79                                 | 279.7                                                           | 293.0 | 306.6  | 319.2  | 327.2  | 336.3  | 344.7  | 1.27                   |                        | 0.986    |        |          |                     |                     |
|            | 2229      | 2.58                                 | 319.7                                                           | 433.7 | 559.9  | 693.1  | 816.6  | 928.7  | 1022.8 | 13.83                  |                        | 0.983    |        |          |                     |                     |
| 01.12.2022 | 2202      | 1.78                                 | 316.7                                                           | 384.5 | 449.6  | 498.4  | 546.7  | 595.6  | 650.4  | 6.4                    |                        | 0.990    |        |          |                     |                     |
|            | 2217      | 1.06                                 | 272.7                                                           | 297.1 | 323.2  | 354.5  | 375.3  | 377.2  | 401.2  | 2.52                   |                        | 0.989    |        |          |                     |                     |
|            | 2219      | 1.86                                 | 273.4                                                           | 296.7 | 341.2  | 370.6  | 392.6  | 432.2  | 471.3  | 3.85                   | 274.15                 | 0.988    | 273.15 | 1.02025  | 0.005667            | 0.133354            |
|            | 2226      | 1.25                                 | 265.0                                                           | 277.5 | 293.1  | 304.4  | 315.7  | 328.7  | 335.6  | 1.43                   |                        | 0.988    |        |          |                     |                     |
|            | 2229      | 2.74                                 | 302.2                                                           | 320.4 | 352.0  | 391.6  | 431.3  | 470.2  | 509.2  | 4.21                   |                        | 0.989    |        |          |                     |                     |
| 02.12.2022 | 2202      | 1.38                                 | 290.6                                                           | 397.1 | 514.2  | 619.7  | 730.4  | 833.6  | 916.5  | 12.45                  |                        | 0.989    |        |          |                     |                     |
|            | 2217      | 0.61                                 | 272.7                                                           | 297.1 | 323.2  | 354.5  | 375.3  | 377.2  | 401.2  | 2.52                   |                        | 0.987    |        |          |                     |                     |
|            | 2219      | 1.38                                 | 273.4                                                           | 296.7 | 341.2  | 370.6  | 392.6  | 432.2  | 471.3  | 3.84                   | 273.15                 | 0.986    | 273.15 | 1.02025  | 0.005667            | 0.133354            |
|            | 2226      | 0.85                                 | 265.0                                                           | 277.5 | 293.1  | 304.4  | 315.7  | 328.7  | 335.6  | 1.43                   |                        | 0.986    |        |          |                     |                     |
|            | 2229      | 3.02                                 | 302.2                                                           | 320.4 | 352.0  | 391.6  | 431.3  | 470.2  | 509.2  | 4.2                    |                        | 0.988    |        |          |                     |                     |
