# Supplementary material
Source: MDPI journal article supplement (https://www.mdpi.com/1996-1073/16/20/7217)
Supplement: s1 [file s1]

**Table S1.** The results of CO<sub>2</sub> concentration in soil gas based on measurements series from 30 May 2022 to 4 June 2022

| No. of<br>piezometer | CO <sub>2</sub> concentration in soil gas [ppm] |            |            |            |            |            | average value |
|----------------------|-------------------------------------------------|------------|------------|------------|------------|------------|---------------|
|                      | 30.05.2022                                      | 31.05.2022 | 01.06.2022 | 02.06.2022 | 03.06.2022 | 04.06.2022 |               |
| 1                    | 298                                             | 367        | 900        | 2,573      | 808        | 1,589      | 1,089         |
| 2                    | 357                                             | 365        | 343        | 388        | 998        | 16,914     | 3,227         |
| 3                    | 354                                             | 9,484      | 12,226     | 15,073     | 13,906     | 30,762     | 13,634        |
| 4                    | 5,765                                           | 16,901     | 27,159     | 22,840     | 25,843     | 26,965     | 20,912        |
| 5                    | 3,773                                           | 12,948     | 22,496     | 18,021     | 20,636     | 32,261     | 18,356        |
| 6                    | 1,355                                           | 41,753     | 43,320     | 44,811     | 44,277     | 20,667     | 32,697        |
| 2201                 | 37,892                                          | 22,374     | 21,475     | 23,526     | 0          | 40,291     | 28,147        |
| 2202                 | 45,998                                          | 38,867     | 36,123     | 43,362     | 38,855     | 53,090     | 42,716        |
| 2203                 | 45,143                                          | 40,335     | 39,646     | 24,757     | 43,413     | 25,064     | 36,393        |
| 2204                 | 38,567                                          | 32,851     | 40,357     | 41,280     | 45,250     | 45,103     | 40,568        |
| 2205                 | 28,382                                          | 25,997     | 28,562     | 29,128     | 23,022     | 28,877     | 27,328        |
| 2206                 | 19,349                                          | 24,229     | 16,981     | 16,084     | 17,681     | 16,759     | 18,514        |
| 2207                 | 47,601                                          | 39,207     | 40,109     | 51,643     | 55,772     | 51,269     | 47,600        |
| 2208                 | 51,671                                          | 49,125     | 52,312     | 42,046     | 43,072     | 40,999     | 46,538        |
| 2209                 | 25,920                                          | 22,473     | 24,819     | 21,136     | 31,003     | 23,829     | 24,863        |
| 2210                 | 22,269                                          | 18,024     | 16,297     | 16,360     | 16,843     | 22,124     | 18,653        |
| 2211                 | 24,933                                          | 44,084     | 35,258     | 28,783     | 38,886     | 18,189     | 31,689        |
| 2212                 | 42,851                                          | 48,202     | 49,319     | 51,870     | 33,826     | 45,964     | 45,339        |
| 2213                 | 15,302                                          | 41,985     | 22,908     | 22,352     | 24,383     | 24,016     | 25,158        |
| 2214                 | 27,026                                          | 25,235     | 23,772     | 24,319     | 24,317     | 22,899     | 24,595        |
| 2215                 | 21,652                                          | 18,064     | 17,821     | 28,504     | 18,295     | 19,527     | 20,644        |
| 2216                 | 3,160                                           | 29,236     | 29,524     | 9,981      | 10,177     | 10,465     | 15,424        |
| 2217                 | 38,178                                          | 19,545     | 18,168     | 50,480     | 54,788     | 22,163     | 33,887        |
| 2218                 | 19,807                                          | 16,420     | 18,032     | 26,458     | 26,464     | 16,212     | 20,566        |
| 2219                 | 23,634                                          | 21,665     | 42,645     | 19,856     | 22,864     | 20,448     | 25,185        |
| 2220                 | 42,139                                          | 14,247     | 45,002     | 46,994     | 46,189     | 12,819     | 34,565        |
| 2221                 | 36,940                                          | 41,074     | 40,385     | 43,723     | 44,558     | 40,127     | 41,135        |
| 2222                 | 12,337                                          | 7,166      | 8,338      | 16,029     | 8,013      | 10,994     | 10,480        |
| 2223                 | 2,941                                           | 22,675     | 22,517     | 30,125     | 20,395     | 14,621     | 18,879        |
| 2224                 | 28,070                                          | 43,408     | 48,595     | 42,590     | 29,515     | 43,440     | 39,270        |
| 2225                 | 30,896                                          | 31,793     | 55,589     | 28,964     | 25,347     | 23,030     | 32,603        |
| 2226                 | 19,706                                          | 44,365     | 45,256     | 12,248     | 48,389     | 7,215      | 29,530        |
| 2227                 | 18,150                                          | 17,900     | 15,032     | 16,741     | 12,768     | 13,309     | 15,650        |
| 2228                 | 15,040                                          | 13,254     | 12,189     | 14,766     | 15,208     | 12,804     | 13,877        |
| 2229                 | 36,659                                          | 48,990     | 52,092     | 52,951     | 48,495     | 40,501     | 46,615        |
| 2230                 | 22,878                                          | 11,274     | 19,694     | 20,470     | 20,100     | 17,726     | 18,690        |
| 2231                 | 13,254                                          | 12,057     | 13,541     | 12,653     | 12,738     | 40,281     | 17,421        |
| 2232                 | 14,551                                          | 13,664     | 12,800     | 12,322     | 12,575     | 11,125     | 12,840        |
| 2233                 | 14,022                                          | 17,815     | 17,091     | 12,248     | 14,898     | 12,388     | 14,744        |
| 2234                 | 19,856                                          | 18,985     | 19,821     | 20,756     | 22,108     | 20,271     | 20,300        |
| 2235                 | 9,948                                           | 51,002     | 49,591     | 52,025     | 53,463     | 23,175     | 39,867        |
| 2236                 | 24,584                                          | 21,792     | 20,589     | 20,856     | 20,965     | 20,982     | 21,628        |
| 2237                 | 9,539                                           | 32,125     | 30,720     | 33,353     | 33,884     | 21,966     | 26,931        |

**Table S2.** The results of CO<sub>2</sub> concentration in soil gas based on measurements series from 6 June 2022 to 14 June 2022

| No. of<br>piezometer | CO <sub>2</sub> concentration in soil gas [ppm] |            |            |            |            |            | average value |
|----------------------|-------------------------------------------------|------------|------------|------------|------------|------------|---------------|
|                      | 06.06.2022                                      | 07.06.2022 | 08.06.2022 | 09.06.2022 | 10.06.2022 | 14.06.2022 |               |
| 1                    | 17,539                                          | 4,924      | 17,105     | 1,609      | 13,629     | 245        | 10,961        |
| 2                    | 1,991                                           | 18,097     | 4,128      | 12,591     | 3,899      | 818        | 8,141         |
| 3                    | 21,897                                          | 20,218     | 21,444     | 15,307     | 16,837     | 8,376      | 19,141        |
| 4                    | 26,838                                          | 44,263     | 35,645     | 2,356      | 21,102     | 26,911     | 26,041        |
| 5                    | 15,875                                          | 44,134     | 17,749     | 42,327     | 1,246      | 1,489      | 24,266        |
| 6                    | 53,096                                          | 58,133     | 58,804     | 45,959     | 37,015     | 44,936     | 50,601        |
| 2201                 | 36,169                                          | 25,203     | 23,157     | 23,097     | 42,921     | 37,086     | 30,109        |
| 2202                 | 57,634                                          | 44,253     | 58,852     | 42,056     | 40,188     | 21,720     | 48,597        |
| 2203                 | 20,984                                          | 17,777     | 38,775     | 17,070     | 17,473     | 22,693     | 22,416        |
| 2204                 | 44,855                                          | 56,614     | 51,295     | 34,039     | 34,280     | 28,101     | 44,217        |
| 2205                 | 30,180                                          | 63,000     | 33,840     | 49,157     | 33,564     | 28,177     | 41,948        |
| 2206                 | 18,543                                          | 39,664     | 15,846     | 50,780     | 33,710     | 36,980     | 31,709        |
| 2207                 | 44,439                                          | 40,378     | 55,558     | 41,899     | 42,944     | 28,872     | 45,044        |
| 2208                 | 45,411                                          | 22,257     | 44,965     | 21,943     | 23,558     | 20,759     | 31,627        |
| 2209                 | 23,610                                          | 19,124     | 24,316     | 20,129     | 21,101     | 18,224     | 21,656        |
| 2210                 | 23,855                                          | 20,529     | 21,636     | 20,186     | 20,969     | 20,451     | 21,435        |
| 2211                 | 42,132                                          | 45,022     | 50,891     | 45,779     | 57,007     | 21,039     | 48,166        |
| 2212                 | 54,604                                          | 51,984     | 48,869     | 49,520     | 50,068     | 48,996     | 51,009        |
| 2213                 | 24,489                                          | 25,509     | 26,413     | 6,494      | 24,667     | 29,139     | 21,514        |
| 2214                 | 29,584                                          | 27,879     | 23,384     | 25,175     | 28,395     | 29,074     | 26,883        |
| 2215                 | 21,418                                          | 27,879     | 32,928     | 26,457     | 29,019     | 31,253     | 27,540        |
| 2216                 | 12,052                                          | 38,330     | 15,535     | 1,910      | 2,076      | 1,170      | 13,981        |
| 2217                 | 44,854                                          | 24,152     | 20,971     | 24,044     | 25,891     | 28,193     | 27,982        |
| 2218                 | 28,955                                          | 28,651     | 24,539     | 22,456     | 17,860     | 19,601     | 24,492        |
| 2219                 | 18,375                                          | 19,716     | 20,755     | 12,713     | 10,459     | 6,971      | 16,404        |
| 2220                 | 13,828                                          | 14,511     | 7,661      | 5,740      | 2,106      | 12,901     | 8,769         |
| 2221                 | 53,294                                          | 47,907     | 38,819     | 43,918     | 41,688     | 38,203     | 45,125        |
| 2222                 | 9,332                                           | 39,365     | 6,936      | 33,822     | 594        | 34,268     | 18,010        |
| 2223                 | 14,835                                          | 10,101     | 13,018     | 16,435     | 45,886     | 34,402     | 20,055        |
| 2224                 | 45,607                                          | 52,354     | 54,128     | 57,573     | 51,706     | 29,084     | 52,274        |
| 2225                 | 27,061                                          | 16,743     | 50,656     | 51,600     | 46,219     | 34,060     | 38,456        |
| 2226                 | 12,570                                          | 14,480     | 8,364      | 16,848     | 17,053     | 16,217     | 13,863        |
| 2227                 | 15,733                                          | 15,326     | 13,817     | 17,849     | 16,691     | 15,718     | 15,883        |
| 2228                 | 15,326                                          | 13,835     | 15,003     | 14,260     | 15,391     | 15,160     | 14,763        |
| 2229                 | 41,260                                          | 51,800     | 49,537     | 40,871     | 20,537     | 51,409     | 40,801        |
| 2230                 | 2,434                                           | 20,143     | 60,114     | 19,973     | 30,468     | 83,422     | 26,626        |
| 2231                 | 47,841                                          | 28,704     | 66,188     | 61,307     | 56,781     | 49,461     | 52,164        |
| 2232                 | 23,845                                          | 23,483     | 25,192     | 24,608     | 23,035     | 13,450     | 24,033        |
| 2233                 | 12,268                                          | 11,077     | 13,254     | 12,274     | 12,821     | 14,740     | 12,339        |
| 2234                 | 19,063                                          | 18,483     | 14,528     | 17,928     | 21,515     | 17,590     | 18,303        |
| 2235                 | 57,252                                          | 19,049     | 21,749     | 43,936     | 20,477     | 26,374     | 32,493        |
| 2236                 | 22,843                                          | 21,482     | 21,324     | 22,200     | 21,489     | 16,725     | 21,868        |
| 2237                 | 41,965                                          | 41,947     | 40,105     | 27,042     | 19,691     | 21,288     | 34,150        |

**Table S3.** The results of CO<sub>2</sub> concentration in soil gas in additional piezometers drilled in 2022 based on measurements series performed from 30 May 2022 to 4 June 2022

| No. of<br>piezometer | CO <sub>2</sub> concentration in soil gas [ppm] |            |            |            |            |            | average value |
|----------------------|-------------------------------------------------|------------|------------|------------|------------|------------|---------------|
|                      | 30.05.2022                                      | 31.05.2022 | 01.06.2022 | 02.06.2022 | 03.06.2022 | 04.06.2022 |               |
| ST1_1                | 1,321                                           | 1,625      | 2,162      | 1,710      | 1,516      | 3,692      | 2,648         |
| ST1_2                | 1,685                                           | 2,012      | 1,909      | 2,081      | 1,826      | 3,716      | 2,757         |
| ST1_3                | 1,325                                           | 1,658      | 1,755      | 1,643      | 1,288      | 3,615      | 2,736         |
| ST1_4                | 550                                             | 449        | 343        | 612        | 363        | 3,683      | 2,726         |
| ST1_5                | 600                                             | 589        | 521        | 355        | 1,466      | 410        | 401           |
| ST1_6                | 591                                             | 601        | 598        | 1,502      | 1,027      | 394        | 321           |
| ST2_1                | 9,881                                           | 12,001     | 15,711     | 13,559     | 16,302     | 13,723     | 4,375         |
| ST2_2                | 7,214                                           | 1,100      | 880        | 565        | 789        | 2,762      | 1,571         |
| ST2_3                | 550                                             | 650        | 399        | 1,807      | 4,937      | 44,385     | 13,269        |
| ST2_4                | 6,235                                           | 7,999      | 7,561      | 14,093     | 12,874     | 10,580     | 7,266         |
| ST2_5                | 19,252                                          | 22,650     | 23,603     | 14,617     | 3,658      | 9,295      | 3,800         |
| ST2_6                | 2,156                                           | 2,555      | 2,825      | 3,525      | 5,480      | 3,024      | 1,665         |

**Table S4.** The results of CO<sub>2</sub> concentration in soil gas in additional piezometers drilled in 2022 based on measurements series performed from 6 June 2022 to 14 June 2022

| No. of<br>piezometer | CO <sub>2</sub> concentration in soil gas [ppm] |            |            |            |            |            | average value |
|----------------------|-------------------------------------------------|------------|------------|------------|------------|------------|---------------|
|                      | 06.06.2022                                      | 07.06.2022 | 08.06.2022 | 09.06.2022 | 10.06.2022 | 14.06.2022 |               |
| ST1_1                | 2,310                                           | 48,293     | 18,239     | 1,968      | 4,644      | 2,566      | 15,091        |
| ST1_2                | 2,579                                           | 2,139      | 58,907     | 1,764      | 3,244      | 2,088      | 13,727        |
| ST1_3                | 2,890                                           | 2,093      | 79,405     | 18,634     | 2,239      | 14,616     | 21,052        |
| ST1_4                | 2,832                                           | 411        | 74,359     | 2,581      | 1,403      | 2,948      | 16,317        |
| ST1_5                | 698                                             | 1,208      | 6,772      | 439        | 376        | 2,016      | 1,899         |
| ST1_6                | 821                                             | 572        | 26,334     | 1,107      | 418        | 2,565      | 5,851         |
| ST2_1                | 46,078                                          | 18,541     | 45,773     | 987        | 2,964      | 1,187      | 22,869        |
| ST2_2                | 3,610                                           | 6,546      | 4,756      | 57,853     | 65,538     | 33,504     | 27,660        |
| ST2_3                | 1,654                                           | 11,664     | 2,411      | 3,072      | 8,603      | 26,307     | 5,481         |
| ST2_4                | 57,417                                          | 11,343     | 1,072      | 7,641      | 9,493      | 25,109     | 17,393        |
| ST2_5                | 18,718                                          | 84,075     | 424        | 7,609      | 8,860      | 21,238     | 23,937        |
| ST2_6                | 19,583                                          | 57,320     | 440        | 53,348     | 57,832     | 61,768     | 37,705        |
