# Supplementary material
Source: MDPI journal article supplement (https://www.mdpi.com/1996-1073/16/20/7217)
Supplement: s1 [file s1]

**Table S5.** The results of CO<sub>2</sub> concentration in soil gas based on measurements series performed from 07.09.2022 to 12.09.2022

| No. of<br>piezometer | CO <sub>2</sub> concentration in soil gas [ppm] |            |            |            |            | average value |
|----------------------|-------------------------------------------------|------------|------------|------------|------------|---------------|
|                      | 07.09.2022                                      | 08.09.2022 | 09.09.2022 | 10.09.2022 | 12.09.2022 |               |
| 1                    | 13,474                                          | 15,490     | 19,618     | 15,111     | 266        | 12,792        |
| 2                    | 19,013                                          | 20,563     | 20,484     | 12,681     | 270        | 14,602        |
| 3                    | 6,137                                           | 7,265      | 11,516     | 12,543     | 3,720      | 8,236         |
| 4                    | 26,076                                          | 22,863     | 38,662     | 30,990     | 17,052     | 27,129        |
| 5                    | 23,490                                          | 23,102     | 27,536     | 27,093     | 2,978      | 20,840        |
| 6                    | 48,947                                          | 48,325     | 48,245     | 46,792     | 23,381     | 43,138        |
| 2201                 | 34,675                                          | 35,662     | 37,969     | 38,548     | 23,832     | 34,137        |
| 2202                 | 44,480                                          | 44,355     | 45,370     | 45,048     | 32,536     | 42,358        |
| 2203                 | 32,034                                          | 30,358     | 31,048     | 32,064     | 38,759     | 32,853        |
| 2204                 | 30,038                                          | 29,883     | 34,000     | 37,255     | 39,761     | 34,187        |
| 2205                 | 46,412                                          | 47,824     | 47,144     | 55,669     | 44,414     | 48,293        |
| 2206                 | 48,652                                          | 50,710     | 51,364     | 53,138     | 35,653     | 47,903        |
| 2207                 | 41,227                                          | 43,550     | 48,963     | 48,794     | 40,862     | 44,679        |
| 2208                 | 24,207                                          | 25,669     | 32,270     | 35,262     | 44,725     | 32,427        |
| 2209                 | 22,658                                          | 22,545     | 22,024     | 22,720     | 23,136     | 22,617        |
| 2210                 | 21,884                                          | 21,278     | 22,937     | 24,408     | 27,797     | 23,661        |
| 2211                 | 13,271                                          | 8999,5     | 14,409     | 8,206      | 49,105     | 18,798        |
| 2212                 | 48,552                                          | 55,713     | 56,113     | 50,594     | 44,295     | 51,053        |
| 2213                 | 32,321                                          | 28,612     | 35,937     | 35,288     | 34,512     | 33,334        |
| 2214                 | 27,383                                          | 28,061     | 32,903     | 33,396     | 49,826     | 34,314        |
| 2215                 | 22,813                                          | 23,122     | 25,046     | 27,647     | 21,361     | 23,998        |
| 2216                 | 8,327                                           | 1,925      | 20,609     | 20,515     | 29,877     | 16,251        |
| 2217                 | 33,846                                          | 12,877     | 36,391     | 34,793     | 69,204     | 37,422        |
| 2218                 | 29,904                                          | 30,668     | 30,787     | 23,336     | 44,075     | 31,754        |
| 2219                 | 21,519                                          | 22,753     | 19,229     | 4,429      | 37,927     | 21,171        |
| 2220                 | 21,090                                          | 29,789     | 19,644     | 19,459     | 53,502     | 28,697        |
| 2221                 | 31,255                                          | 29,917     | 35,544     | 29,691     | 32,147     | 31,711        |
| 2222                 | 28,637                                          | 36,120     | 48,470     | 48,340     | 23,669     | 37,047        |
| 2223                 | 42,664                                          | 40,370     | 31,244     | 31,780     | 33,632     | 35,938        |
| 2224                 | 68,832                                          | 62,419     | 22,767     | 69,078     | 46,419     | 53,903        |
| 2225                 | 14,157                                          | 17,218     | 24,888     | 18,205     | 28,038     | 20,501        |
| 2226                 | 19,184                                          | 17,581     | 19,279     | 19,066     | 46,733     | 24,369        |
| 2227                 | 17,881                                          | 17,480     | 17,899     | 18,140     | 32,093     | 20,699        |
| 2228                 | 17,585                                          | 16,235     | 16,573     | 16,995     | 20,849     | 17,647        |
| 2229                 | 51,541                                          | 22,965     | 56,479     | 26,118     | 61,518     | 43,724        |
| 2230                 | 6,758                                           | 22,971     | 13,574     | 17,785     | 15,574     | 15,332        |
| 2231                 | 24,591                                          | 32,484     | 49,024     | 43,213     | 23,937     | 34,650        |
| 2232                 | 22,368                                          | 20,764     | 24,917     | 22,085     | 18,851     | 21,797        |
| 2233                 | 23,671                                          | 23,763     | 23,946     | 22,366     | 19,266     | 22,602        |
| 2234                 | 22,951                                          | 24,553     | 24,305     | 23,878     | 29,521     | 25,042        |
| 2235                 | 22,497                                          | 25,762     | 27,171     | 21,106     | 22,695     | 23,846        |
| 2236                 | 19,539                                          | 20,764     | 25,951     | 25,875     | 22,244     | 22,875        |
| 2237                 | 28,592                                          | 27,712     | 27,322     | 2,800      | 19,928     | 21,271        |

**Table S6.** The results of CO<sub>2</sub> concentration in soil gas in additional piezometers drilled in 2022 based on measurements series from 13.09.2022 to 17.09.2022

| No. of<br>piezometer | CO <sub>2</sub> concentration in soil gas [ppm] |            |            |            |            | average value |
|----------------------|-------------------------------------------------|------------|------------|------------|------------|---------------|
|                      | 13.09.2022                                      | 14.09.2022 | 15.09.2022 | 16.09.2022 | 17.09.2022 |               |
| 1                    | 828                                             | 8,539      | 5,498      | 2,809      | 7,516      | 5,038         |
| 2                    | 718                                             | 4,214      | 2,194      | 1,741      | 3,307      | 2,435         |
| 3                    | 10,058                                          | 9,725      | 10,695     | 10,728     | 12,437     | 10,729        |
| 4                    | 16,680                                          | 17,212     | 19,059     | 40,661     | 20,301     | 22,783        |
| 5                    | 14,081                                          | 12,412     | 13,048     | 32,400     | 37,036     | 21,795        |
| 6                    | 22,331                                          | 19,624     | 30,960     | 40,598     | 30,088     | 28,720        |
| 2201                 | 50,373                                          | 57,130     | 57,168     | 45,706     | 34,663     | 49,008        |
| 2202                 | 47,853                                          | 40,653     | 48,615     | 38,407     | 36,456     | 42,397        |
| 2203                 | 42,609                                          | 41,917     | 51,215     | 30,241     | 42,204     | 41,637        |
| 2204                 | 40,999                                          | 41,649     | 52,315     | 32,736     | 37,756     | 41,091        |
| 2205                 | 42,034                                          | 46,060     | 55,231     | 45,095     | 29,371     | 43,558        |
| 2206                 | 37,754                                          | 37,578     | 58,281     | 50,949     | 25,479     | 42,008        |
| 2207                 | 37,194                                          | 41,440     | 39,581     | 53,082     | 47,145     | 43,688        |
| 2208                 | 30,484                                          | 28,655     | 33,125     | 41,213     | 27,798     | 32,255        |
| 2209                 | 26,984                                          | 26,696     | 31,285     | 25,669     | 51,310     | 32,389        |
| 2210                 | 28,186                                          | 28,654     | 38,654     | 24,193     | 40,162     | 31,970        |
| 2211                 | 47,941                                          | 47,558     | 52,512     | 11,772     | 48,179     | 41,592        |
| 2212                 | 41,962                                          | 41,704     | 42,325     | 50,007     | 42,854     | 43,770        |
| 2213                 | 40,558                                          | 41,420     | 41,055     | 33,772     | 28,034     | 36,968        |
| 2214                 | 24,486                                          | 23,335     | 33,128     | 34,022     | 30,154     | 29,025        |
| 2215                 | 22,168                                          | 22,320     | 28,368     | 26,289     | 20,563     | 23,942        |
| 2216                 | 21,658                                          | 21,391     | 25,158     | 17,143     | 479        | 17,166        |
| 2217                 | 38,607                                          | 67,479     | 40,568     | 25,883     | 22,084     | 38,924        |
| 2218                 | 44,557                                          | 42,051     | 46,738     | 18,795     | 24,105     | 35,249        |
| 2219                 | 68,414                                          | 35,521     | 46,075     | 31,088     | 19,215     | 40,063        |
| 2220                 | 33,439                                          | 40,156     | 45,125     | 24,837     | 355        | 28,782        |
| 2221                 | 25,898                                          | 28,518     | 30,587     | 35,005     | 22,078     | 28,417        |
| 2222                 | 33,055                                          | 22,689     | 28,124     | 20,446     | 38,921     | 28,647        |
| 2223                 | 27,575                                          | 35,098     | 31,555     | 51,284     | 26,020     | 34,306        |
| 2224                 | 28,864                                          | 20,077     | 39,071     | 75,671     | 68,067     | 46,350        |
| 2225                 | 21,687                                          | 20,885     | 30,587     | 38,075     | 11,946     | 24,636        |
| 2226                 | 47,950                                          | 47,447     | 55,781     | 21,312     | 18,753     | 38,249        |
| 2227                 | 32,212                                          | 28,566     | 30,128     | 26,459     | 22,092     | 27,891        |
| 2228                 | 21,009                                          | 20,145     | 24,581     | 19,807     | 18,379     | 20,784        |
| 2229                 | 47,687                                          | 51,595     | 62,371     | 59,688     | 48,050     | 53,878        |
| 2230                 | 25,243                                          | 23,111     | 36,304     | 17,165     | 14,311     | 23,227        |
| 2231                 | 24,722                                          | 23,712     | 31,521     | 69,175     | 59,203     | 41,667        |
| 2232                 | 19,613                                          | 18,363     | 20,587     | 26,341     | 23,328     | 21,646        |
| 2233                 | 18,268                                          | 17,649     | 20,128     | 22,481     | 21,922     | 20,090        |
| 2234                 | 35,235                                          | 31,615     | 30,723     | 26,684     | 25,385     | 29,928        |
| 2235                 | 31,922                                          | 27,652     | 29,205     | 34,695     | 32,948     | 31,284        |
| 2236                 | 22,629                                          | 21,437     | 27,125     | 26,759     | 25,206     | 24,631        |
| 2237                 | 22,606                                          | 27,724     | 33,556     | 22,860     | 22,966     | 25,942        |

**Table S7.** The results of CO<sub>2</sub> concentration in soil gas in additional piezometers drilled in 2022 based on measurements series performed from 07.09.2022 to 12.09.2022

| No. of<br>piezometer | CO <sub>2</sub> concentration in soil gas [ppm] |            |            |            |            | average value |
|----------------------|-------------------------------------------------|------------|------------|------------|------------|---------------|
|                      | 07.09.2022                                      | 08.09.2022 | 09.09.2022 | 10.09.2022 | 12.09.2022 |               |
| ST1_1                | 9,665                                           | 2,564      | 40,240     | 35,249     | 13,513     | 20,246        |
| ST1_2                | 4,919                                           | 9,187      | 6,642      | 10,235     | 4,050      | 7,007         |
| ST1_3                | 4,154                                           | 6,772      | 956        | 2,803      | 1,553      | 3,248         |
| ST1_4                | 3,616                                           | 5,225      | 2,016      | 33,871     | 15,464     | 12,038        |
| ST1_5                | 8999,9                                          | 5,497      | 8,378      | 8,875      | 7,669      | 7,884         |
| ST1_6                | 5,106                                           | 33,715     | 6,925      | 44,807     | 6,782      | 19,467        |
| ST2_1                | 2,223                                           | 1,569      | 1,482      | 1148,3     | 1,211      | 1,527         |
| ST2_2                | 25,819                                          | 27,872     | 40,001     | 38,560     | 8,701      | 28,191        |
| ST2_3                | 6,629                                           | 22,685     | 37,018     | 18,464     | 509,3      | 17,061        |
| ST2_4                | 41,010                                          | 21,601     | 29,654     | 13,959     | 15,736     | 24,392        |
| ST2_5                | 16,785                                          | 9,543      | 19,398     | 19,420     | 21,171     | 17,263        |
| ST2_6                | 65,148                                          | 67,961     | 73,793     | 73,828     | 3,466      | 56,839        |

**Table S8.** The results of CO<sub>2</sub> concentration in soil gas in additional piezometers drilled in 2022 based on measurements series performed from 13.09.2022 to 17.09.2022

| No. of<br>piezometer | CO <sub>2</sub> concentration in soil gas [ppm] |            |            |            |            | average value |
|----------------------|-------------------------------------------------|------------|------------|------------|------------|---------------|
|                      | 13.09.2022                                      | 14.09.2022 | 15.09.2022 | 16.09.2022 | 17.09.2022 |               |
| ST1_1                | 13,513                                          | 285        | 16,256     | 7,681      | 44,150     | 17,299        |
| ST1_2                | 4,050                                           | 4,811      | 6,255      | 5,631      | 8,931      | 7,014         |
| ST1_3                | 1,553                                           | 1,871      | 1,580      | 326        | 7,794      | 4,196         |
| ST1_4                | 15,464                                          | 9,564      | 12,680     | 1,553      | 10,025     | 9,253         |
| ST1_5                | 7,669                                           | 8,256      | 5,241      | 16,051     | 10,129     | 10,585        |
| ST1_6                | 6,782                                           | 6,998      | 5,241      | 8,876      | 5,228      | 7,890         |
| ST2_1                | 1,211                                           | 531,7      | 428,6      | 1,205      | 655,8      | 709           |
| ST2_2                | 8,701                                           | 460,6      | 7,905      | 8,251      | 6666,2     | 5,042         |
| ST2_3                | 509,3                                           | 1353,9     | 384,3      | 509,8      | 27,972     | 7,684         |
| ST2_4                | 15,736                                          | 18,983     | 1,988      | 9,852      | 20,989     | 13,359        |
| ST2_5                | 21,171                                          | 21,576     | 18,182     | 10,241     | 5,296      | 13,005        |
| ST2_6                | 3,466                                           | 3,315      | 8,420      | 12,541     | 63,212     | 24,850        |
